# Supplementary material
Source: MDPI journal article supplement (https://www.mdpi.com/2225-1154/10/8/115)
Supplement: s1 [file s1]

Table S1: Keywords combination used in WoS and Scopus databases.

|               |                                                                                                                                                                                                                                                                                                                                                                                                                                                                      |
|---------------|----------------------------------------------------------------------------------------------------------------------------------------------------------------------------------------------------------------------------------------------------------------------------------------------------------------------------------------------------------------------------------------------------------------------------------------------------------------------|
| <b>WoS</b>    | TS= (("Climate change" OR "global warming" OR "greenhouse" OR "CO2") AND ("cities" OR "city" OR urban*) AND (adapt* OR mitigat* OR polic*) AND ("IPCC" OR "Intergovernmental Panel on Climate Change"))                                                                                                                                                                                                                                                              |
| <b>Scopus</b> | TITLE-ABS-KEY (("climate change" OR "global warming" OR "greenhouse" OR "co2") AND ("cities" OR "city" OR urban*) AND (adapt* OR mitigat* OR polic*) AND ("ipcc" OR "intergovernmental panel on climate change")) AND (PUBYEAR > 1985) AND (LIMIT-TO (DOCTYPE,"ar" ) OR LIMIT-TO ( DOCTYPE,"ch") OR LIMIT-TO ( DOCTYPE,"cp") OR LIMIT-TO (DOCTYPE,"bk")) AND (LIMIT-TO (LANGUAGE,"English") OR LIMIT-TO (LANGUAGE,"Spanish" ) OR LIMIT-TO ( LANGUAGE,"Portuguese" )) |
