# Supplementary material
Source: MDPI journal article supplement (https://www.mdpi.com/2225-1154/10/8/115)
Supplement: s1 [file s1]

**Table S2:** Summary of the studies used in the systematic review. Note: NR (Not Indicated) shows studies that did not indicate the method used and DOI.

| Code | Authors                                                   | Year | Title                                                                                                                                                | Focus      | Outcome         | Spatial dimension | Country                   | Method used           | Main concern            | Specific concern addressed                     | DOI                           |
|------|-----------------------------------------------------------|------|------------------------------------------------------------------------------------------------------------------------------------------------------|------------|-----------------|-------------------|---------------------------|-----------------------|-------------------------|------------------------------------------------|-------------------------------|
| 1    | Marchettini, N., Pulselli, F. M., Tiezzi, E.              | 2005 | Sources and sinks: emission and absorption of greenhouse gas, a case study in Italy                                                                  | Adaptation | Recommendation  | Local             | Sienna, Italy             | IPCC methodology      | Air quality             | Pollution-GHG                                  | *NR                           |
| 2    | Vellinga, P., Klein, R. J. T.                             | 1993 | Climate change, sea level rise and integrated coastal zone management: An IPCC approach                                                              | Adaptation | Recommendations | Global            |                           | IPCC methodology      | Sea level rise/flooding | Vulnerability to sea level rise                | 10.1016/0964-5691(93)90029-X  |
| 5    | Garg, A., Shukla, P. R., Bhattacharya, S., Dadhwal, V. K. | 2001 | Sub-region (district) and sector level SO <sub>2</sub> and NO <sub>x</sub> emissions for India: Assessment of inventories and mitigation flexibility | Mitigation | Recommendations | National          | South India               | IPCC methodology      | Air quality             | Pollution- SO <sub>2</sub> and NO <sub>x</sub> | 10.1016/S1352-2310(00)00316-2 |
| 6    | van Luijelaar, H., Dirkzwager, A. H.                      | 2002 | Quicksan climatic change and urban drainage                                                                                                          | Adaptation | Recommendations | National          | Netherlands               | Scenarios/projections | Socio-economic          | Urban drainage systems                         | 10.1061/40644(2002)246        |
| 7    | Sanderson, J., Islam, S. M. N.                            | 2003 | Economic development and climate change in Southeast Asia: The SEADICE model and its forecasts for growth prospects and policy strategies            | Adaptation | Recommendations | International     | Southeast Asian countries | Model                 | Socio-economic          | Economic growth                                | 10.1504/IJGENVI.2003.004149   |
| 8    | Semadeni-Davies, A.                                       | 2003 | Response surfaces for climate change impact assessments in urban areas                                                                               | Mitigation | Recommendations | National          | Sweden                    | Model                 | Socio-economic          | Wastewater inflows                             | 10.2166/wst.2003.0518         |

|    |                                                                                                                 |      |                                                                                                        |                                                          |                 |               |                             |                       |                     |                               |                                             |
|----|-----------------------------------------------------------------------------------------------------------------|------|--------------------------------------------------------------------------------------------------------|----------------------------------------------------------|-----------------|---------------|-----------------------------|-----------------------|---------------------|-------------------------------|---------------------------------------------|
| 9  | Wilbanks, T. J., Kane, S. M., Leiby, P. N., Perlack, R. D., Settle, C., Shogren, J. F., Smith, J. B.            | 2006 | Possible Responses to Global Climate Change: Integrating Mitigation and Adaptation                     | Both adaptation and mitigation adaptation and mitigation | Recommendations | Local         | Cochin, India               | *NR                   | Socio-economic      | Climate change response       | 10.1080/00139150309604547                   |
| 13 | Reginster, I., Rounsevell, M.                                                                                   | 2006 | Scenarios of future urban land use in Europe                                                           | Adaptation                                               | Recommendations | International | All European countries      | Scenarios/projections | Socio-economic      | Future land use in Europe     | 10.1068/b31079                              |
| 15 | Shukla, P. R., Garg, A., Kapshe, M., Nair, R.                                                                   | 2006 | India's non-CO2 GHG emissions: Development pathways and mitigation flexibility                         | Mitigation                                               | Recommendations | National      | India                       | IPCC methodology      | Air quality         | Outdoor pollution-CH4 and NO2 | 10.5547/issn0195-6574-ej-volsi2006-nosi3-24 |
| 17 | Gruebler, A., O'Neill, B., Riahi, K., Chirkov, V., Goujon, A., Kolp, P., Prommer, I., Scherbov, S., Slentoe, E. | 2007 | Regional, national, and spatially explicit scenarios of demographic and economic change based on SRES  | Adaptation                                               | Recommendations | Local         | Mokpo, Korea                | IPCC methodology      | Socio-economic      | Climate change vulnerability  | 10.1016/j.techfore.2006.05.023              |
| 18 | Hunt, J. C. R., Maslin, M., Killeen, T., Backlund, P., Schellnhuber, H. J.                                      | 2007 | Introduction. Climate change and urban areas: research dialogue in a policy framework                  | Mitigation                                               | Recommendations | Global        |                             | *NR                   | Socio-economic      | Future of the world's climate | 10.1098/rsta.2007.2089                      |
| 21 | Pizzigallo, A. C. I., Pulselli, R. M., Marchettini, N.                                                          | 2007 | The greenhouse gas inventory of a local urban transport: The case of the municipality of Siena (Italy) | Adaptation                                               | Recommendations | Global        |                             | *NR                   | Socio-economic      | Megacity urbanization         | 10.2495/UT070011                            |
| 22 | Barredo, J., Gómez, M. D.                                                                                       | 2008 | Towards a set of IPCC SRES urban land use scenarios: modelling urban land use in the Madrid region     | Mitigation                                               | Recommendations | International | China, U.S.A, Brazil, India | Scenarios/projections | Extreme temperature | Heat fluxes                   | 10.1007/978-3-540-68498-5_14                |

|    |                                                               |      |                                                                                                  |                                |                 |               |                                                                                                                         |                       |                |                                 |                               |
|----|---------------------------------------------------------------|------|--------------------------------------------------------------------------------------------------|--------------------------------|-----------------|---------------|-------------------------------------------------------------------------------------------------------------------------|-----------------------|----------------|---------------------------------|-------------------------------|
| 23 | Cruz-Nunez, X., Conde, L., Ruiz-Suarez, L. G.                 | 2008 | Use of IPCC GHG key sources analysis to Mexico's environmental policy                            | Both adaptation and mitigation | Recommendations | International | Los Angeles, Athens, Qinhuaangdao, Toronto, Adelaide, Montreal, Milan, San Francisco, Campbelltown, Venice, Baton Rouge | *NR                   | Socio-economic | Landscaping activities          | 10.1007/s11027-007-9085-6     |
| 25 | Jenkins, D., Liu, Y., Peacock, A. D.                          | 2008 | Climatic and internal factors affecting future UK office heating and cooling energy consumptions | Adaptation                     | Recommendations | Global        |                                                                                                                         | *NR                   | Socio-economic | Urban resilience                | 10.1016/j.enbuild.2007.06.006 |
| 27 | Manojlovic, N., Pasche, E.                                    | 2008 | Integration of resiliency measures into flood risk management concepts of communities            | Mitigation                     | Recommendations | Global        |                                                                                                                         | *NR                   | Socio-economic | Climate and energy policies     | 10.2495/FRIAR080231           |
| 30 | Ramaswami, A. Hillman, T., Janson, B., Reiner, M., Thomas, G. | 2008 | A demand-centered, hybrid life-cycle methodology for city-scale greenhouse gas inventories       | Both adaptation and mitigation | Recommendations | National      | Ecuador                                                                                                                 | IPCC methodology      | Socio-economic | Residential houses              | 10.1021/es702992q             |
| 34 | Barton, J. R.                                                 | 2009 | Adaptation to climate change in city-regional planning                                           | Adaptation                     | Recommendations | Local         | Santiago, Chile                                                                                                         | *NR                   | Socio-economic | Citi-regional planning          | *NR                           |
| 35 | Chung, U., Jung, J.-E., Seo, H.-C., Yun, J. I.                | 2009 | Using urban effect corrected temperature data and a tree                                         | Adaptation                     | Recommendations | Local         | Castilla y León, Spain                                                                                                  | Scenarios/projections | Socio-economic | Repercussions of climate change | 10.1007/s10584-008-9504-z     |

|    |                                                                                                                                                                                                                                                                                                     |      |                                                                                                                  |            |                 |               |                             |                          |                         |                              |                              |
|----|-----------------------------------------------------------------------------------------------------------------------------------------------------------------------------------------------------------------------------------------------------------------------------------------------------|------|------------------------------------------------------------------------------------------------------------------|------------|-----------------|---------------|-----------------------------|--------------------------|-------------------------|------------------------------|------------------------------|
|    |                                                                                                                                                                                                                                                                                                     |      | phenology model to project geographical shift of cherry flowering date in South Korea                            |            |                 |               |                             |                          |                         |                              |                              |
| 36 | Cope, M., Lee, S., Physick, B., Abbs, D., Nguyen, K., McGregor, J.                                                                                                                                                                                                                                  | 2009 | A Methodology for Determining the Impact of Climate Change on Ozone Level in an Urban Area                       | Adaptation | Recommendations | Local         | Sydney, Australia           | *NR                      | Health                  | Ozone impact on human health | *NR                          |
| 37 | Franck, T.                                                                                                                                                                                                                                                                                          | 2009 | Coastal adaptation and economic tipping points                                                                   | Adaptation | Recommendations | Local         | Gulf coast communities- USA | Model                    | Sea level rise/flooding | Sea level rise               | 10.1108/14777830910963762    |
| 40 | Knol, A. B., de Hartog, J. J., Boogaard, H., Slottje, P., van der Sluijs, J. P., Lebre, E., Cassee, F. R., Wardekker, A., Ayres, J. G., Borm, P. J., Brunekreef, B., Donaldson, K., Forastiere, F., Holgate, S. T., Kreyling, W. G., Nemery, B., Pekkanen, J., Stone, V., Wichmann, H. E., Hoek, G. | 2009 | Expert elicitation on ultrafine particles: likelihood of health effects and causal pathways                      | Adaptation | Recommendations | International |                             | Survey and participatory | Health                  | Mortality and morbidity      | 10.1186/1743-8977-6-19       |
| 42 | Moeslund, J. E., Bocher, P. K., Svenning, J. -C., Molhave, T., Arge, L.                                                                                                                                                                                                                             | 2009 | Impacts of 21(st) century sea-level rise on a Danish major city - an assessment based on fine-resolution digital | Adaptation | Recommendations | Local         | Aarhus, Denmark             | Model                    | Sea level rise/flooding | Flooding                     | 10.1088/1755-1315/8/1/012022 |

|    |                                                                              |      |                                                                                                                               |            |                 |               |                                         |                       |                      |                                                           |                                  |
|----|------------------------------------------------------------------------------|------|-------------------------------------------------------------------------------------------------------------------------------|------------|-----------------|---------------|-----------------------------------------|-----------------------|----------------------|-----------------------------------------------------------|----------------------------------|
|    |                                                                              |      | topography and a new flooding algorithm                                                                                       |            |                 |               |                                         |                       |                      |                                                           |                                  |
| 44 | Norman, B.                                                                   | 2009 | Principles for an intergovernmental agreement for coastal planning and climate change in Australia                            | Adaptation | Recommendations | National      | Australia                               | *NR                   | Socio-economic       | Coastal urbanization                                      | 10.1016/j.habitatint.2008.10.002 |
| 45 | Øyen, C. F., Nielsen, S. B.                                                  | 2009 | Management Tools for Sustainable and Adaptive Building Design                                                                 | Adaptation | Recommendations | National      | Norway                                  | *NR                   | Socio-economic       | Building designs                                          | 10.1002/9781444312195.ch7        |
| 48 | Salleh, K. O.                                                                | 2009 | Climate insecurity: The challenge for Malaysia and the developing countries of southeast Asia                                 | Adaptation | Recommendations | International | Malaysia and other developing countries | *NR                   | Socio-economic       | Poverty                                                   | *NR                              |
| 51 | Ward, P. J., van Balen, R. T., Verstraeten, G., Renssen, H., Vandenbergh, J. | 2009 | The impact of land use and climate change on late Holocene and future suspended sediment yield of the Meuse catchment         | Mitigation | Recommendations | Local         | Meuse, France                           | Scenarios/projections | Socio-economic       | Land use                                                  | 10.1016/j.geomorph.2008.07.006   |
| 52 | Aylett, A.                                                                   | 2010 | Conflict, Collaboration and Climate Change: Participatory Democracy and Urban Environmental Struggles in Durban, South Africa | Adaptation | Recommendations | Local         | Durban, South Africa                    | *NR                   | Socio-economic       | Participatory democracy and urban environmental struggles | 10.1111/j.1468-2427.2010.00964.x |
| 53 | Gober, P., Kirkwood, C. W., Balling, R. C., Ellis, A. W., Deitrick, S.       | 2010 | Water Planning Under Climatic Uncertainty in Phoenix: Why We Need a New Paradigm                                              | Adaptation | Recommendations | Local         | Phoenix, USA                            | Scenarios/projections | Water supply/drought | Water supply and demand                                   | 10.1080/00045601003595420        |
| 54 | Guo, R., Zhu, Q., Cao, X., Ren, Z., Li, F., Pradhan, M.                      | 2010 | GIS-based carbon balance assessment and its application in Shanghai                                                           | Mitigation | Recommendations | Local         | Shanghai, China                         | IPCC methodology      | Air quality          | Pollution-CO2                                             | 10.1063/1.3456325                |

|    |                                                                                                                                                                         |      |                                                                                                                                   |            |                 |               |                                                                                                                                                             |                       |                         |                |                                           |
|----|-------------------------------------------------------------------------------------------------------------------------------------------------------------------------|------|-----------------------------------------------------------------------------------------------------------------------------------|------------|-----------------|---------------|-------------------------------------------------------------------------------------------------------------------------------------------------------------|-----------------------|-------------------------|----------------|-------------------------------------------|
| 55 | Hansen, H. S.                                                                                                                                                           | 2010 | Modelling the future coastal zone urban development as implied by the IPCC SRES and assessing the impact from sea level rise      | Adaptation | Recommendations | Global        |                                                                                                                                                             | Scenarios/projections | Sea level rise/flooding | Sea level rise | 10.1016/j.lan<br>durbplan.201<br>0.08.018 |
| 58 | Kang, H., 유가영,<br>박성우, 정동기,<br>황진환                                                                                                                                      | 2010 | Development and Application of a Methodology for Climate Change Vulnerability Assessment -Sea Level Rise Impact on a Coastal City | Adaptation | Recommendations | Local         | Mokpo,<br>Korea                                                                                                                                             | IPCC methodology      | Sea level rise/flooding | Sea level rise | *NR                                       |
| 59 | Kennedy, C.,<br>Steinberger, J.,<br>Gasson, B., Hansen,<br>Y., Hillman, T.,<br>Havranek, M.,<br>Pataki, D.,<br>Phdungsilp, A.,<br>Ramaswami, A.,<br>Villalba Mendez, G. | 2010 | Methodology for inventorying greenhouse gas emissions from global cities                                                          | Mitigation | Recommendations | International | Los Angeles County, Denver City and County, Greater Toronto, New York City, Greater London, Geneva Canton, Greater Prague, Barcelona, Cape Town and Bangkok | Scenarios/projections | Air quality             | Pollution      | 10.1016/j.enp<br>ol.2009.08.05<br>0       |

|    |                                                                                                                                                             |      |                                                                                                              |            |                 |          |                              |                          |                         |                          |                                  |
|----|-------------------------------------------------------------------------------------------------------------------------------------------------------------|------|--------------------------------------------------------------------------------------------------------------|------------|-----------------|----------|------------------------------|--------------------------|-------------------------|--------------------------|----------------------------------|
| 60 | Lee, K. H.,<br>Levermore, G. J.,                                                                                                                            | 2010 | Weather data for future climate change for South Korean building design: Analysis for trends                 | Mitigation | Recommendations | National | Seoul and Ulsan, South Korea | Model                    | Extreme temperatures    | Heat and cold            | 10.3763/asre.2008.0055           |
| 61 | Ma, C., Ju, M.-t.,<br>Zhang, X.-c., Li, H.-y.                                                                                                               | 2010 | Energy consumption and carbon emissions in a coastal city in China                                           | Mitigation | Recommendations | Local    | Tianjin, China               | IPCC methodology         | Socio-economic          | Energy consumption       | 10.1016/j.proenv.2011.03.001     |
| 64 | Mortsch, L. D.                                                                                                                                              | 2010 | Multiple Dimensions of Vulnerability and Its Influence on Adaptation Planning and Decision Making            | Adaptation | Recommendations | Local    | London, Ontario, Canada      | Scenarios/projections    | Sea level rise/flooding | Flooding                 | 10.1007/978-94-007-1770-1_5      |
| 65 | Muthers, S.,<br>Matzarakis, A.,<br>Koch, E.                                                                                                                 | 2010 | Climate Change and Mortality in Vienna-A Human Biometeorological Analysis Based on Regional Climate Modeling | Adaptation | Recommendations | Local    | Vienna, Austria              | Model                    | Health                  | Mortality                | 10.3390/ijerph7072965            |
| 67 | New York City Panel on Climate, C.                                                                                                                          | 2010 | Adaptation assessment guidebook New York City Panel on Climate Change                                        | Adaptation | Recommendations | Local    | New York City, USA           | *NR                      | Socio-economic          | Planning                 | 10.1111/j.1749-6632.2010.05324.x |
| 68 | O'Neill, M. S.,<br>Jackman, D. K.,<br>Wyman, M.,<br>Manarolla, X.,<br>Gronlund, C. J.,<br>Brown, D. G.,<br>Brines, S. J.,<br>Schwartz, J., Diez-Roux, A. V. | 2010 | US local action on heat and health: are we prepared for climate change?                                      | Adaptation | Recommendations | National | 285 US communities           | Survey and participatory | Extreme temperature     | Heat                     | 10.1007/s00038-009-0071-5        |
| 70 | Rosenzweig, C.,<br>Solecki, W., New                                                                                                                         | 2010 | Introduction to Climate Change Adaptation in New York City: Building                                         | Adaptation | Recommendations | Local    | New York City, USA           | *NR                      | Socio-economic          | Risk management response | 10.1111/j.1749-                  |

|    |                                                                                                                   |      |                                                                                                              |            |                                                                                                                                                                     |          |                              |                       |                |                            |                              |
|----|-------------------------------------------------------------------------------------------------------------------|------|--------------------------------------------------------------------------------------------------------------|------------|---------------------------------------------------------------------------------------------------------------------------------------------------------------------|----------|------------------------------|-----------------------|----------------|----------------------------|------------------------------|
|    | York City Panel on Climate, C.                                                                                    |      | a Risk Management Response                                                                                   |            |                                                                                                                                                                     |          |                              |                       |                |                            | 6632.2009.05306.x            |
| 71 | Shrotriya, V., Smout, L.                                                                                          | 2010 | GHG emissions: An assessment at municipal solid waste disposal site in Indore, India                         | Mitigation | Recommendations                                                                                                                                                     | Local    | Indore, India                | Scenarios/projections | Socio-economic | Solid waste management     | 10.1504/IJET M.2010.038014   |
| 72 | Vano, J. A., Voisin, N., Cuo, L., Hamlet, A. F., Elsner, M. M., Palmer, R. N., Polebitski, A., Lettenmaier, D. P. | 2010 | Climate change impacts on water management in the Puget Sound region, Washington State, USA                  | Adaptation | Recommendations                                                                                                                                                     | National | Everett, Seattle, and Tacoma | Scenarios/projections | Socio-economic | Water management           | 10.1007/s10584-010-9846-1    |
| 73 | Wilder, M., Scott, C. A., Pablos, N. P., Varady, R. G., Garfin, G. M., McEvoy, J.                                 | 2010 | Adapting across boundaries: Climate change, social learning, and resilience in the U.S.-Mexico border region | Adaptation | Specific evidence (shared social learning, the formation of binational “communities of practice” among water managers or disaster-relief planners, and the coproduc | Local    | Arizonia, USA                | *NR                   | Socio-economic | Building adaptive capacity | 10.1080/00045608.2010.500235 |



|    |                                                                                                                                                                                                                                                                                                                                                                                                                  |      |                                                                                                                      |                                         |                                      |                   |                                                                                                                                                                               |                           |                    |                             |                                              |
|----|------------------------------------------------------------------------------------------------------------------------------------------------------------------------------------------------------------------------------------------------------------------------------------------------------------------------------------------------------------------------------------------------------------------|------|----------------------------------------------------------------------------------------------------------------------|-----------------------------------------|--------------------------------------|-------------------|-------------------------------------------------------------------------------------------------------------------------------------------------------------------------------|---------------------------|--------------------|-----------------------------|----------------------------------------------|
|    |                                                                                                                                                                                                                                                                                                                                                                                                                  |      |                                                                                                                      |                                         | tion of<br>climate<br>knowled<br>ge) |                   |                                                                                                                                                                               |                           |                    |                             |                                              |
| 74 | Xie, Z. Q., Du, Y.,<br>Zeng, Y., Yan, M. L.,<br>Zhu, C. Y.                                                                                                                                                                                                                                                                                                                                                       | 2010 | Accelerated human<br>activities affecting the<br>spatial pattern of<br>temperature in the<br>Yangtze River Delta     | Adaptation                              | Recomm<br>endation<br>s              | Local             | Zigzag,<br>China                                                                                                                                                              | Scenarios/pr<br>ojections | Socio-<br>economic | Urbanization                | 10.1016/j.qua<br>int.2010.04.0<br>27         |
| 75 | Yohe, G.,<br>Leichenko, R., New<br>York City Panel on<br>Climate, C.                                                                                                                                                                                                                                                                                                                                             | 2010 | Adopting a risk-based<br>approach                                                                                    | Both<br>adaptation<br>and<br>mitigation | Recomm<br>endation<br>s              | Local             | New York<br>City, USA                                                                                                                                                         | *NR                       | Socio-<br>economic | Risk management<br>response | 10.1111/j.174<br>9-<br>6632.2009.05<br>310.x |
| 76 | Baccini, M.,<br>Kosatsky, T.,<br>Analitis, A.,<br>Anderson, H. R.,<br>D'Ovidio, M.,<br>Menne, B.,<br>Michelozzi, P.,<br>Biggeri, A.,<br>Kirchmayer, U.,<br>de'Donato, F.,<br>D'Ovidio, M.,<br>D'Ippoliti, D.,<br>Marino, C.,<br>McGregor, G.,<br>Accetta, G.,<br>Katsouyanni, K.,<br>Kassomenos, P.,<br>Sunyer, J., Atkinson,<br>R., Medina, S.,<br>Paldy, A., Bisanti,<br>L., Cadum, G.,<br>Kriz, B., Hojs, A., | 2011 | Impact of heat on<br>mortality in 15 European<br>cities: Attributable deaths<br>under different weather<br>scenarios | Mitigation                              | Recomm<br>endation<br>s              | Internation<br>al | Athens,<br>Barcelona,<br>Budapest,<br>Dublin,<br>Helsinki,<br>Ljubljana,<br>London,<br>Milan,<br>Paris,<br>Prague,<br>Rome,<br>Stockholm,<br>Turin,<br>Valencia<br>and Zurich | Model                     | Health             | Mortality                   | 10.1136/jech.<br>2008.085639                 |

|    |                                                                                                                                                                                                                                                          |      |                                                                                                                                   |            |                 |               |                                                   |                       |                      |                    |                                |
|----|----------------------------------------------------------------------------------------------------------------------------------------------------------------------------------------------------------------------------------------------------------|------|-----------------------------------------------------------------------------------------------------------------------------------|------------|-----------------|---------------|---------------------------------------------------|-----------------------|----------------------|--------------------|--------------------------------|
|    | Clancy, L.,<br>Goodman, P.,<br>Forsberg, B.,<br>Pekkanen, J.,<br>Woityniak, B.,<br>Jolliffe, I.,<br>Jendritzky, G.,<br>Blazejczyk, K.,<br>Huth, R., Cegnar,<br>T., Schindler, C.,<br>Ballester, F.,<br>Monceau,<br>GKalkstein, ., L. S.,<br>the P. C. G. |      |                                                                                                                                   |            |                 |               |                                                   |                       |                      |                    |                                |
| 77 | Brooks, N.                                                                                                                                                                                                                                               | 2011 | Human responses to climatically-driven landscape change and resource scarcity: Learning from the past and planning for the future | Mitigation | Recommendations | Global        |                                                   | *NR                   | Socio-economic       | Resource scarcity  | 10.1007/978-90-481-9413-1_4    |
| 81 | Galvão, C. O.,<br>Oishi, S., Nóbrega,<br>R. L. B., Dantas, M. S.                                                                                                                                                                                         | 2011 | Rainwater catchment systems under climate change: An assessment of Brazilian and Japanese cases                                   | Adaptation | Recommendations | International | Brazil, Japan                                     | Model                 | Water supply/drought | Water supply       | *NR                            |
| 82 | Garg, A., Kankal, B., Shukla, P. R.                                                                                                                                                                                                                      | 2011 | Methane emissions in India: Sub-regional and sectoral trends                                                                      | Mitigation | Recommendations | National      | India                                             | Scenarios/projections | Air quality          | Pollution-CO2      | 10.1016/j.atmosenv.2011.06.004 |
| 83 | Geng, Y., Peng, C., Tian, M.                                                                                                                                                                                                                             | 2011 | Energy use and CO2 emission inventories in the four municipalities of China                                                       | Mitigation | Recommendations | National      | Beijing, Shanghai, Tianjin, and Chongqing (China) | IPCC methodology      | Socio-economic       | Energy consumption | 10.1016/j.egypro.2011.03.063   |

|    |                                                                                       |      |                                                                                                                      |            |                 |          |                           |                          |                |                          |                                            |
|----|---------------------------------------------------------------------------------------|------|----------------------------------------------------------------------------------------------------------------------|------------|-----------------|----------|---------------------------|--------------------------|----------------|--------------------------|--------------------------------------------|
| 84 | Geng, Y., Tian, M., Zhu, Q., Zhang, J., Peng, C.                                      | 2011 | Quantification of provincial-level carbon emissions from energy consumption in China                                 | Mitigation | Recommendations | National | China                     | IPCC methodology         | Socio-economic | Energy consumption       | 10.1016/j.rser.2011.07.005                 |
| 86 | Hoang, V. H.                                                                          | 2011 | Housing and climate change: Adaptation strategies in Vietnam                                                         | Adaptation | Recommendations | National | Vietnam                   | *NR                      | Socio-economic | Housing                  | 10.1007/978-90-481-9867-2_10               |
| 87 | Jiang, L., Hardee, K.                                                                 | 2011 | How do Recent Population Trends Matter to Climate Change?                                                            | Adaptation | Recommendations | Global   |                           | Scenarios/projections    | Socio-economic | Family planning          | 10.1007/s11113-010-9189-7                  |
| 89 | Li, Y., Guo, T., Li, P.                                                               | 2011 | Study on Ecological Footprint Calculation of Beijing's Urban Domestic Garbage                                        | Mitigation | Recommendations | Local    | Beijing, China            | IPCC methodology         | Socio-economic | Urban domestic waste     | 10.4028/www.scientific.net/AMR.356-360.756 |
| 90 | McLaughlin, B. J., Murrell, S. D., DesRoches, S.                                      | 2011 | Case study: Assessment of the vulnerability of Port Authority of NY & NJ facilities to the impacts of climate change | Adaptation | Recommendations | National | New York, New Jersey, USA | *NR                      | Socio-economic | Port vulnerability       | 10.1061/41167(398)92                       |
| 91 | Ostro, B., Rauch, S., Green, S.                                                       | 2011 | Quantifying the health impacts of future changes in temperature in California                                        | Mitigation | Recommendations | Local    | California                | Scenarios/projections    | Health         | Mortality and morbidity  | 10.1016/j.envres.2011.08.013               |
| 92 | Pandve, H. T., Chawla, P. S., Fernandez, K., Singru, S. A., Khismatrao, D., Pawar, S. | 2011 | Assessment of awareness regarding climate change in an urban community                                               | Mitigation | Recommendations | Local    | Pune, India               | Survey and participatory | Socio-economic | Climate change awareness | 10.4103/0019-5278.93200                    |
| 93 | Pandve, H. T., Raut, A.                                                               | 2011 | Assessment of awareness regarding climate change and its health hazards                                              | Mitigation | Recommendations | Local    | Pune, India               | Descriptive statistics   | Socio-economic | Climate change awareness | 10.4103/0019-5278.82999                    |

|     |                                                                                                                                           |      |                                                                                                                  |            |                                       |               |                       |                          |                         |                                                                            |                                  |
|-----|-------------------------------------------------------------------------------------------------------------------------------------------|------|------------------------------------------------------------------------------------------------------------------|------------|---------------------------------------|---------------|-----------------------|--------------------------|-------------------------|----------------------------------------------------------------------------|----------------------------------|
|     |                                                                                                                                           |      | among the medical students                                                                                       |            |                                       |               |                       |                          |                         |                                                                            |                                  |
| 94  | Park, S., Jin, C., Choi, C.                                                                                                               | 2011 | Predicting soil erosion under land-cover area and climate changes using the revised universal Soil loss equation | Mitigation | Recommendations                       | National      | South Korea           | Scenarios/projections    | Socio-economic          | Soil erosion                                                               | 10.1117/12.896325                |
| 96  | Roño, R. A., Ajero, M., Punte, S.                                                                                                         | 2011 | Air quality and climate change in Asia: Making co-benefits work                                                  | Mitigation | Recommendations                       | International | Asia                  | *NR                      | Air quality             | Pollution-CO2                                                              | *NR                              |
| 97  | Sanstad, A. H., Johnson, H., Goldstein, N., Franco, G.                                                                                    | 2011 | Projecting long-run socioeconomic and demographic trends in California under the SRES A2 and B1 scenarios        | Adaptation | Recommendations                       | National      | California State, USA | Scenarios/projections    | Socio-economic          | Population, urbanization patterns, economic growth, and electricity prices | 10.1007/s10584-011-0296-1        |
| 99  | Shin, S., Tae, S., Lee, B.                                                                                                                | 2011 | Estimate of the carbon dioxide uptake by the urban green space for a carbon-neutral Sejong city in Korea         | Mitigation | Specific evidence (urban green space) | Local         | Sejong, Korea         | IPCC methodology         | Air quality             | Pollution-CO2                                                              | 10.5390/SUSB.2011.2.1.007        |
| 101 | Smith, J. B., Strzepek, K. M., Cardini, J., Castaneda, M., Holland, J., Quiroz, C., Wigley, T. M. L., Herrero, J., Hearne, P., Furlow, J. | 2011 | Coping with climate variability and climate change in La Ceiba, Honduras                                         | Mitigation | Recommendations                       | Local         | La Ceiba, Honduras    | Survey and participatory | Sea level rise/flooding | Flooding                                                                   | 10.1007/s10584-011-0161-2        |
| 104 | Traill, L. W., Perhans, K., Lovelock, C. E., Prohaska, A., McFallan, SRhodes,                                                             | 2011 | Managing for change: Wetland transitions under sea-level rise and outcomes for threatened species                | Mitigation | Recommendations                       | Local         | Queensland, Australia | Model                    | Sea level rise/flooding | Sea level rise                                                             | 10.1111/j.1472-4642.2011.00807.x |

|     |                                                           |      |                                                                                                                                                                            |            |                 |       |                         |                       |                         |                                |                                     |
|-----|-----------------------------------------------------------|------|----------------------------------------------------------------------------------------------------------------------------------------------------------------------------|------------|-----------------|-------|-------------------------|-----------------------|-------------------------|--------------------------------|-------------------------------------|
|     | ., J. R., Wilson, K. A.                                   |      |                                                                                                                                                                            |            |                 |       |                         |                       |                         |                                |                                     |
| 105 | Wilson, C. O., Weng, Q.                                   | 2011 | Simulating the impacts of future land use and climate changes on surface water quality in the Des Plaines River watershed, Chicago Metropolitan Statistical Area, Illinois | Mitigation | Recommendations | Local | Chicago, USA            | Model                 | Water supply/drought    | Water quality                  | 10.1016/j.scitotenv.2011.07.001     |
| 106 | Ye, W., Li, Y.                                            | 2011 | A method of applying daily GCM outputs in assessing climate change impact on multiple day extreme precipitation for Brisbane River Catchment                               | Adaptation | Recommendations | Local | Brisbane, Australia     | Scenarios/projections | Sea level rise/flooding | Flooding                       | *NR                                 |
| 107 | Yoo, G., Hwang, J. H., Choi, C.                           | 2011 | Development and application of a methodology for vulnerability assessment of climate change in coastal cities                                                              | Adaptation | Recommendations | Local | Busan, South Korea      | Scenarios/projections | Socio-economic          | Vulnerability                  | 10.1016/j.oceanaman.2011.04.001     |
| 108 | Zhang, J., Zhao, J., Jia, S., Li, Q., Liu, S.             | 2011 | A method to estimate the spatial distribution of transport carbon emissions in Shanghai                                                                                    | Mitigation | Recommendations | Local | Shanghai, China         | Model                 | Air quality             | Outdoor pollution              | 10.1109/Geoinformatics.2011.5980965 |
| 109 | Zhang, J. Y., Zhang, Y., Yang, Z. F., Li, S. S.           | 2011 | An Estimation and Factor Decomposition Analysis of Energy-related Carbon Emissions in Beijing                                                                              | Mitigation | Recommendations | Local | Beijing, China          | Model                 | Socio-economic          | Energy related carbon emission | 10.1016/j.proenv.2012.01.152        |
| 110 | Adachi, S. A., Kimura, F., Kusaka, H., Inoue, T. Ueda, H. | 2012 | Comparison of the impact of global climate changes and urbanization on                                                                                                     | Mitigation | Recommendations | Local | Tokyo metropolitan area | Scenarios/projections | Extreme temperature     | Urban heat island intensity    | 10.1029/2010GL042518                |

|     |                                                                             |      |                                                                                                                                             |            |                 |          |                             |                          |                         |                               |                                   |
|-----|-----------------------------------------------------------------------------|------|---------------------------------------------------------------------------------------------------------------------------------------------|------------|-----------------|----------|-----------------------------|--------------------------|-------------------------|-------------------------------|-----------------------------------|
|     |                                                                             |      | summertime future climate in the Tokyo metropolitan area                                                                                    |            |                 |          |                             |                          |                         |                               |                                   |
| 111 | Bhuiyan, M. J. A. N., Dutta, D.                                             | 2012 | Assessing impacts of sea level rise on river salinity in the Gorai river network, Bangladesh                                                | Adaptation | Recommendations | Local    | Gorai, Bangladesh           | Model                    | Sea level rise/flooding | Sea level rise                | 10.1016/j.ecss.2011.11.005        |
| 112 | Bormann, H., Ahlhorn, F., Klenke, T.                                        | 2012 | Adaptation of water management to regional climate change in a coastal region - Hydrological change vs. community perception and strategies | Adaptation | Recommendations | Local    | Wesermarsch County, Germany | Survey and participatory | Socio-economic          | Water management              | 10.1016/j.jhydrol.2012.05.063     |
| 113 | Henderson-Sellers, A., McGuffie, K.                                         | 2012 | The Future of the World's Climate                                                                                                           | Mitigation | Recommendations | Global   |                             | *NR                      | Socio-economic          | Future of the world's climate | 10.1016/C2010-0-67318-4           |
| 115 | Kii, M., Doi, K.                                                            | 2012 | Projecting global urbanization and the growth of megacities                                                                                 | Mitigation | Recommendations | Global   |                             | Model                    | Socio-economic          | Urbanization                  | 10.1108/S2044-9941(2012)000003004 |
| 116 | Markus, M., Wuebbles, D. J., Liang, X. Z., Hayhoe, K., Kristovich, D. A. R. | 2012 | Diagnostic analysis of future climate scenarios applied to urban flooding in the Chicago metropolitan area                                  | Adaptation | Recommendations | Local    | Chicago, USA                | Scenarios/projections    | Sea level rise/flooding | Flooding                      | 10.1007/s10584-011-0172-z         |
| 117 | Pauliuk, S., Dhaniati, N. M. A., Muller, D. B.                              | 2012 | Reconciling Sectoral Abatement Strategies with Global Climate Targets: The Case of the Chinese Passenger Vehicle Fleet                      | Mitigation | Recommendations | National | China                       | Scenarios/projections    | Air quality             | Pollution-CO2                 | 10.1021/es201799k                 |

|     |                                                                                     |      |                                                                                                                                                   |            |                 |               |                                              |                       |                         |                                                    |                           |
|-----|-------------------------------------------------------------------------------------|------|---------------------------------------------------------------------------------------------------------------------------------------------------|------------|-----------------|---------------|----------------------------------------------|-----------------------|-------------------------|----------------------------------------------------|---------------------------|
| 118 | Rivas, I., Güitrón, A., Montero, M.                                                 | 2012 | Hydrologic vulnerability to climate change of the Lerma-Chapala Basin, Mexico                                                                     | Adaptation | Recommendations | Local         | Lerma, Mexico                                | Scenarios/projections | Water supply/drought    | Water quality issues                               | 10.2495/ST110271          |
| 119 | Roehl, E. A., Daamen, R. C., Cook, J. B.                                            | 2012 | Estimating salinity effects due to climate change on the Georgia and South Carolina Coasts: Poster session at WQTC 2012, Toronto, ON              | Adaptation | Recommendations | National      | Georgia, South Carolina-USA                  | Models                | Sea level rise/flooding | Sea salinity                                       | *NR                       |
| 120 | Schlobinski, S., Gidhagen, L., Olsson, J., Frysinger, S., Denzer, R., Kutschera, P. | 2012 | Integration of climate change effects in local models and urban planning processes                                                                | Adaptation | Recommendations | International | Stockholm, Wuppertal, Linz and Prague        | Scenarios/projections | Socio-economic          | Urban planning                                     | *NR                       |
| 123 | Tromeur, E., Ménard, R., Bailly, J. B., Soulié, C.                                  | 2012 | Urban vulnerability and resilience within the context of climate change                                                                           | Mitigation | Recommendations | Local         | Paris, France                                | Scenarios/projections | Extreme temperature     | Heat                                               | 10.5194/nhes-12-1811-2012 |
| 128 | Dasgupta, S., Gosain, A. K., Rao, S., Roy, S., Sarraf, M.                           | 2013 | A megacity in a changing climate: The case of Kolkata                                                                                             | Adaptation | Recommendations | Local         | Kolkata, India                               | Model                 | Sea level rise/flooding | Flooding                                           | 10.1007/s10584-012-0516-3 |
| 129 | Dienst, C., Schneider, C., Xia, C., Saurat, M., Fischer, T., Vallentin, D.          | 2013 | On track to become a low carbon future city? First findings of the integrated status quo and trends assessment of the pilot city of Wuxi in China | Adaptation | Recommendations | Local         | Wuxi, China                                  | Scenarios/projections | Air quality             | Pollution-CO2                                      | 10.3390/su5083224         |
| 130 | Fong, K. F.                                                                         | 2013 | Solar hybrid air-conditioning design for buildings in hot and humid climates                                                                      | Mitigation | Recommendations | International | Bangkok, Guangzhou, Hong Kong, Kuala Lumpur, | *NR                   | Socio-economic          | Solar hybrid air-conditioning design for buildings | 10.1201/b15507            |

|     |                                                  |      |                                                                                                                                              |            |                 |               |                                 |                       |                      |                        |                                  |
|-----|--------------------------------------------------|------|----------------------------------------------------------------------------------------------------------------------------------------------|------------|-----------------|---------------|---------------------------------|-----------------------|----------------------|------------------------|----------------------------------|
|     |                                                  |      |                                                                                                                                              |            |                 |               | Manila,<br>Singapore,<br>Taipei |                       |                      |                        |                                  |
| 133 | Jacinto, R., Cruz, M. J., Santos, F. D.          | 2013 | Development of water use scenarios as a tool for adaptation to climate change                                                                | Adaptation | Recommendations | National      | Portugal                        | Scenarios/projections | Water supply/drought | Water use              | 10.5194/dwets-6-61-2013          |
| 134 | Junk, W. J.                                      | 2013 | Current state of knowledge regarding South America wetlands and their future under global climate change                                     | Adaptation | Recommendations | International | South American countries        | *NR                   | Socio-economic       | Wetlands               | 10.1007/s00027-012-0253-8        |
| 136 | Kim, O. S.                                       | 2013 | In Pursuit of Low Carbon Cities: Understanding Limitations of ICLEI's International Local Government Greenhouse Gas Emissions Protocol       | Mitigation | Recommendations | Global        |                                 | IPCC methodology      | Air quality          | Pollution              | *NR                              |
| 139 | Lopez, S. R., Hogue, T. S., Stein, E. D.         | 2013 | A framework for evaluating regional hydrologic sensitivity to climate change using archetypal watershed modeling                             | Adaptation | Recommendations | Local         | Santa Barbara-California, USA   | Model                 | Water supply/drought | Hydrologic sensitivity | 10.5194/hess-17-3077-2013        |
| 140 | Loureiro, S. M., Rovere, E. L. L., Mahler, C. F. | 2013 | Analysis of potential for reducing emissions of greenhouse gases in municipal solid waste in Brazil, in the state and city of Rio de Janeiro | Mitigation | Recommendations | National      | Brazil, Rio de Janeiro          | Scenarios/projections | Socio-economic       | Solid waste management | 10.1016/j.wasman.2013.01.024     |
| 142 | Miller-Robbie, L., Ramaswami, A., Kumar, P.      | 2013 | Life Cycle Energy Use and Greenhouse Gas Emission Analysis for a Water Resource Recovery Facility in India                                   | Mitigation | Recommendations | National      | India                           | Model                 | Socio-economic       | Energy use             | 10.2175/106143012x13560205144371 |



|     |                                                                                                           |      |                                                                                                                                                                                                                     |            |                 |          |                                         |                       |                         |                               |                                |
|-----|-----------------------------------------------------------------------------------------------------------|------|---------------------------------------------------------------------------------------------------------------------------------------------------------------------------------------------------------------------|------------|-----------------|----------|-----------------------------------------|-----------------------|-------------------------|-------------------------------|--------------------------------|
| 144 | Novoa, D. C.                                                                                              | 2013 | The Economics of Climate Change, Urbanisation, and Long-Term Flood Protection                                                                                                                                       | Mitigation | Recommendations | Local    | Ho Chi Minh, Vietnam                    | Model                 | Sea level rise/flooding | Flooding                      | 10.1007/978-3-642-31110-9_32   |
| 145 | Petkova, E. P., Horton, R. M., Bader, D. A., Kinney, P. L.                                                | 2013 | Projected heat-related mortality in the U.S. Urban Northeast                                                                                                                                                        | Adaptation | Recommendations | National | Boston, New York, and Philadelphia, USA | *NR                   | Health                  | Mortality                     | 10.3390/ijerph10126734         |
| 146 | Quattrocchi, F., Boschi, E., Spena, A., Buttinelli, M., Cantucci, B., Procesi, M.                         | 2013 | Synergic and conflicting issues in planning underground use to produce energy in densely populated countries, as Italy. Geological storage of CO <sub>2</sub> , natural gas, geothermics and nuclear waste disposal | Mitigation | Recommendations | Local    | Lazio, Italy                            | Model                 | Socio-economic          | Underground energy production | 10.1016/j.apenergy.2012.04.028 |
| 149 | Wheeler, S. M., Tomuta, M., Haden, V. R., Jackson, L. E.                                                  | 2013 | The impacts of alternative patterns of urbanization on greenhouse gas emissions in an agricultural county                                                                                                           | Mitigation | Recommendations | Local    | Yolo county-USA                         | Scenarios/projections | Socio-economic          | Urbanization                  | 10.1080/17549175.2013.777356   |
| 150 | Ye, L., Xiong, W., Li, Z., Yang, P., Wu, W., Yang, G., Fu, Y., Zou, J., Chen, Z., Van Ranst, E., Tang, H. | 2013 | Climate change impact on China food security in 2050                                                                                                                                                                | Mitigation | Recommendations | National | China                                   | Scenarios/projections | Socio-economic          | Food security                 | 10.1007/s13593-012-0102-0      |
| 152 | Ahmed, M. T., Nagi, I., Farag, M., Loutfi, N., Osman, M. A., Mandour, N.                                  | 2014 | Vulnerability of Ras Sudr, Egypt to climate change, livelihood index, an approach to assess                                                                                                                         | Adaptation | Recommendations | Local    | Sudr, Sinai, Egypt                      | IPCC methodology      | Socio-economic          | Vulnerability                 | 10.2166/wcc.2014.006           |

|     |                                                                             |      |                                                                                                                                                      |            |                 |          |                                                                                          |                       |                      |                            |                                                 |
|-----|-----------------------------------------------------------------------------|------|------------------------------------------------------------------------------------------------------------------------------------------------------|------------|-----------------|----------|------------------------------------------------------------------------------------------|-----------------------|----------------------|----------------------------|-------------------------------------------------|
|     | S., Mahmoud, K., Loutfi, N.                                                 |      | risks and develop future adaptation strategy                                                                                                         |            |                 |          |                                                                                          |                       |                      |                            |                                                 |
| 155 | Bin, O. YFeng, ., Z. H., Bi, Q. H.                                          | 2014 | Calculation and evaluation methodology of transport energy consumption and carbon emissions: A case study of Jiangsu province                        | Adaptation | Recommendations | Local    | Jiangsu, China                                                                           | Model                 | Socio-economic       | Energy consumption         | 10.4028/ww<br>w.scientific.net/AMR.962-965.1293 |
| 156 | Cheng, Y., Wang, Z., Ye, X., Wei, Y. D.                                     | 2014 | Spatiotemporal dynamics of carbon intensity from energy consumption in China                                                                         | Mitigation | Recommendations | National | China                                                                                    | Scenarios/projections | Air quality          | Pollution                  | 10.1007/s11442-014-1110-6                       |
| 158 | Deng, X., Zhao, C., Lin, Y., Zhang, T., Qu, Y., Zhang, F., Wang, Z., Wu, F. | 2014 | Downscaling the Impacts of Large-Scale LUCC on Surface Temperature along with IPCC RCPs: A Global Perspective                                        | Adaptation | Recommendations | Global   | USA, Brazil, India                                                                       | Scenarios/projections | Socio-economic       | Land use/land cover change | 10.3390/en7042720                               |
| 160 | Fallmann, J., Emeis, S., Suppan, P.                                         | 2014 | Modeling of the urban heat island and its effect on air quality using WRF/WRF-Chem – Assessment of mitigation strategies for a central European city | Mitigation | Recommendations | Local    | Stuttgart, Germany                                                                       | Model                 | Extreme temperature  | Urban heat island          | 10.1007/978-3-319-04379-1_60                    |
| 162 | Huang, Q. X., He, C. Y., Liu, Z. F., Shi, P. J.                             | 2014 | Modeling the impacts of drying trend scenarios on land systems in northern China using an integrated SD and CA model                                 | Adaptation | Recommendations | National | Beijing, Tianjin, Hebei, Shanxi, Inner Mongolia, Jilin, Liaoning, Heilongjiang, Shaanxi, | Model                 | Water supply/drought | Drought                    | 10.1007/s11430-013-4799-7                       |

|     |                                                                         |      |                                                                                                                                                          |            |                 |          |                                                                |                       |                     |                       |                             |
|-----|-------------------------------------------------------------------------|------|----------------------------------------------------------------------------------------------------------------------------------------------------------|------------|-----------------|----------|----------------------------------------------------------------|-----------------------|---------------------|-----------------------|-----------------------------|
|     |                                                                         |      |                                                                                                                                                          |            |                 |          | Gansu, Ningxia, Qinghai, Xinjiang, China                       |                       |                     |                       |                             |
| 163 | Jacobi, P. R.                                                           | 2014 | Mudanças climáticas e ensino superior: a combinação entre pesquisa e educação                                                                            | Adaptation | Recommendations | Local    | Brazil, Sao Paulo                                              | *NR                   | Socio-economic      | Education             | 10.1590/0104-4060.38107     |
| 166 | Kim, Y. M., Kim, S., Liu, Y.                                            | 2014 | The impact of climate change on heat-related mortality in six major cities, South Korea, under representative concentration pathways (RCPs)              | Mitigation | Recommendations | National | Seoul, Daegu, Gwangju, Busan, Incheon and Daejeon, South Korea | Model                 | Health              | Mortality             | 10.3389/fenvs.2014.00003    |
| 169 | McPhee, J., Cortés, G., Rojas, M., Garcia, L., Descalzi, A., Vargas, L. | 2014 | Downscaling climate changes for Santiago: What effects can be expected?                                                                                  | Adaptation | Recommendations | Local    | Santiago, Chile                                                | Scenarios/projections | Extreme temperature | Heat                  | 10.1007/978-3-642-39103-3_2 |
| 170 | Mitsova, D.                                                             | 2014 | Coupling Land Use Change Modeling with Climate Projections to Estimate Seasonal Variability in Runoff from an Urbanizing Catchment Near Cincinnati, Ohio | Mitigation | Recommendations | Local    | Greater Cincinnati area, Ohio, USA                             | Scenarios/projections | Socio-economic      | Urban runoff          | 10.3390/ijgi3041256         |
| 172 | Pelling, M., Blackburn, S.                                              | 2014 | Megacities and the coast: Risk, resilience and transformation                                                                                            | Adaptation | Recommendations | Global   |                                                                | *NR                   | Socio-economic      | Megacity urbanization | 10.4324/9780203066423       |

|     |                                                                                                                                                          |      |                                                                                                                                                                |            |                 |               |                                                        |                       |                      |                           |                                 |
|-----|----------------------------------------------------------------------------------------------------------------------------------------------------------|------|----------------------------------------------------------------------------------------------------------------------------------------------------------------|------------|-----------------|---------------|--------------------------------------------------------|-----------------------|----------------------|---------------------------|---------------------------------|
| 173 | Pingale, S. M., Jat, M. K., Khare, D.                                                                                                                    | 2014 | Integrated urban water management modelling under climate change scenarios                                                                                     | Adaptation | Recommendations | Local         | Ajmer, India                                           | Model                 | Socio-economic       | Water management          | 10.1016/j.resconrec.2013.10.006 |
| 175 | Revi, A., Satterthwaite, D., Aragón-Durand, F., Corfee-Morlot, J., Kiunsi, R. B. R., Pelling, M., Roberts, D., Solecki, W., S Gajjar, . P., Sverdlik, A. | 2014 | Towards transformative adaptation in cities: The IPCC's Fifth Assessment                                                                                       | Adaptation | Recommendations | International | Dar es Salaam, Durban, London and New York City        | *NR                   | Socio-economic       | Protection of urban areas | 10.1177/0956247814523539        |
| 176 | Ribeiro Neto, A., Scott, C. A., Lima, E. A., Montenegro, S. M. G. L., Cirilo, J. A.                                                                      | 2014 | Infrastructure sufficiency in meeting water demand under climate-induced socio-hydrological transition in the urbanizing Capibaribe River basin &ndash; Brazil | Adaptation | Recommendations | Local         | Capibaribe , Brazil                                    | Model                 | Water supply/drought | Water demand              | 10.5194/hess-18-3449-2014       |
| 178 | Shevchenko, O., Lee, H., Snizhko, S., Mayer, H.                                                                                                          | 2014 | Long-term analysis of heat waves in Ukraine                                                                                                                    | Adaptation | Recommendations | National      | Ukraine                                                | IPCC methodology      | Extreme temperature  | Heat waves                | 10.1002/joc.3792                |
| 180 | Singh, V. P., Mishra, A. K., Chowdhary, H., Prakash Khedun, C.                                                                                           | 2014 | Climate change and its impact on water resources                                                                                                               | Adaptation | Recommendations | Global        |                                                        | *NR                   | Socio-economic       | Water resources           | 10.1007/978-1-62703-595-8_11    |
| 181 | Sun, M., Yuan, Y., Zhang, J., Wang, R., Wang, Y.                                                                                                         | 2014 | Greenhouse gas emissions estimation and ways to mitigate emissions in the Yellow River Delta High-efficient Eco-economic Zone, China                           | Mitigation | Recommendations | National      | YRDHEZ-Dongying, Binzhou, Weifang, Dezhou, Yantai, and | Scenarios/projections | Air quality          | Outdoor/indoor pollution  | 10.1016/j.jclepro.2014.06.032   |

|     |                                                                               |      |                                                                                                                                                  |            |                                          |               |                                    |                        |                         |                              |                              |
|-----|-------------------------------------------------------------------------------|------|--------------------------------------------------------------------------------------------------------------------------------------------------|------------|------------------------------------------|---------------|------------------------------------|------------------------|-------------------------|------------------------------|------------------------------|
|     |                                                                               |      |                                                                                                                                                  |            |                                          |               | Zibo,<br>China                     |                        |                         |                              |                              |
| 182 | Wilkinson, S. J.                                                              | 2014 | Office building adaptation and the growing significance of environmental attributes                                                              | Adaptation | Recommendations                          | Local         | Melbourne, Australia               | Model                  | Socio-economic          | Office buildings             | 10.1108/JCRE-06-2014-0014    |
| 184 | Zahmatkesh, Z., Karamouz, M., Burian, S. J., Tavakol-Davani, H., Goharian, E. | 2014 | LID Implementation to Mitigate Climate Change Impacts on Urban Runoff                                                                            | Mitigation | Specific evidence (green infrastructure) | Local         | New York, USA                      | Model                  | Socio-economic          | Urban runoff                 | 10.1061/9780784413548.097    |
| 187 | Álvarez, R., Zubelzu, S., Díaz, G., López, A.                                 | 2015 | Analysis of low carbon super credit policy efficiency in European Union greenhouse gas emissions                                                 | Mitigation | Recommendations                          | International | EU member countries                | Model                  | Socio-economic          | Low carbon policies          | 10.1016/j.energy.2015.01.110 |
| 188 | André, M. F., Anisimov, O.                                                    | 2015 | Tundra and permafrost-dominated taiga                                                                                                            | Adaptation | Recommendations                          | International | USA, Russia, Canada, Norway        | *NR                    | Sea level rise/flooding | Tundra and permafrost impact | 10.1017/CBO9780511627057.014 |
| 189 | Audefroy, J. F.                                                               | 2015 | Potential effects of climate change on the habitat in Mexico                                                                                     | Adaptation | Recommendations                          | National      | Oaxaca, Tabasco and Yucatán-Mexico | Model                  | Socio-economic          | Urban housing policies       | 10.1108/DPM-08-2014-0166     |
| 193 | Cinar, I.                                                                     | 2015 | Assessing the correlation between land cover conversion and temporal climate change-A pilot study in coastal Mediterranean city, Fethiye, Turkey | Adaptation | Recommendations                          | Local         | Fethiye, Turkey                    | Descriptive statistics | Extreme temperature     | Human thermal comfort        | 10.3390/atmos6081102         |
| 194 | Creutzig, F., Jochem, P., Edelenbosch, O. Y.,                                 | 2015 | Transport: A roadblock to climate change mitigation?                                                                                             | Mitigation | Recommendations                          | Global        |                                    | *NR                    | Air pollution           | Outdoor pollution-CO2        | 10.1126/science.aac8033      |

|     |                                                                   |      |                                                                                                                                                      |                                |                 |               |                                                                                                                         |                       |                         |                        |                              |
|-----|-------------------------------------------------------------------|------|------------------------------------------------------------------------------------------------------------------------------------------------------|--------------------------------|-----------------|---------------|-------------------------------------------------------------------------------------------------------------------------|-----------------------|-------------------------|------------------------|------------------------------|
|     | Mattauch, L., Van Vuuren, D. P., McCollum, D. , Minx, J.          |      |                                                                                                                                                      |                                |                 |               |                                                                                                                         |                       |                         |                        |                              |
| 195 | Deng, X., Liu, J., Ma, E., Jiang, L., Yu, R., Jiang, Q., Zhao, C. | 2015 | Impact assessments on water and heat fluxes of terrestrial ecosystem due to land use change                                                          | Mitigation                     | Recommendations | International | China, U.S.A, Brazil, India                                                                                             | Scenarios/projections | Extreme temperature     | Heat fluxes            | 10.1007/978-3-662-48008-3_5  |
| 196 | El-Batran, M., Aboulnaga, M.                                      | 2015 | Climate change adaptation: An overview on challenges and risks in cities, regions affected, costs and benefits of adaptation, and finance mechanisms | Mitigation                     | Recommendations | National      | Bangladesh                                                                                                              | *NR                   | Sea level rise/flooding | Flooding               | 10.1007/978-3-642-38670-1_33 |
| 197 | Fichera, A., Fortuna, L., Frasca, M., Volpe, R.                   | 2015 | Integration of complex networks for urban energy mapping                                                                                             | Mitigation                     | Recommendations | Local         | Catania, Italy                                                                                                          | Model                 | Socio-economic          | Energy demand          | 10.18280/ijht.330423         |
| 198 | Flannery, J. A., Smith, K. M.                                     | 2015 | Eco-landscape design                                                                                                                                 | Both adaptation and mitigation | Recommendations | International | Los Angeles, Athens, Qinhuaangdao, Toronto, Adelaide, Montreal, Milan, San Francisco, Campbelltown, Venice, Baton Rouge | *NR                   | Socio-economic          | Landscaping activities | 10.1007/978-3-319-07206-7    |

|     |                                                                                                                                                                   |      |                                                                                                                              |                                         |                 |               |                                                             |                          |                            |                                 |                                            |
|-----|-------------------------------------------------------------------------------------------------------------------------------------------------------------------|------|------------------------------------------------------------------------------------------------------------------------------|-----------------------------------------|-----------------|---------------|-------------------------------------------------------------|--------------------------|----------------------------|---------------------------------|--------------------------------------------|
| 199 | Govind, P. J.,<br>Verchick, R. R. M.                                                                                                                              | 2015 | Natural disaster and<br>climate change                                                                                       | Adaptation                              | Recommendations | Local         | Surat,<br>India                                             | *NR                      | Socio-economic             | Vulnerability                   | 10.1017/CBO<br>97811072954<br>14.024       |
| 200 | Gowda, A., Puras<br>Ustarroz, A.,<br>Shaxted, M.                                                                                                                  | 2015 | Preparing for climate<br>change with computation<br>and resiliency                                                           | Adaptation                              | Recommendations | Global        |                                                             | Model                    | Socio-economic             | Climate resiliency              | 10.1061/9780<br>784479070.03<br>4          |
| 201 | Hamdi, R., Giot, O.,<br>De Troch, R.,<br>Deckmyn, A.,<br>Termonia, P.                                                                                             | 2015 | Future climate of<br>Brussels and Paris for the<br>2050s under the A1B<br>scenario                                           | Adaptation                              | Recommendations | International | Brussels,<br>Paris                                          | Scenarios/projections    | Extreme temperature        | Urban heat island               | 10.1016/j.ucli<br>m.2015.03.00<br>3        |
| 204 | Hendrix, C. S.,<br>Haggard, S.                                                                                                                                    | 2015 | Global food prices,<br>regime type, and urban<br>unrest in the developing<br>world                                           | Both<br>adaptation<br>and<br>mitigation | Recommendations | International | Asian and<br>African<br>cities                              | Model                    | Socio-economic             | Food prices and<br>urban unrest | 10.1177/0022<br>34331456159<br>9           |
| 205 | Hoornweg, D.,<br>Bhada-Tata, P.,<br>Kennedy, C.                                                                                                                   | 2015 | Peak Waste: When Is It<br>Likely to Occur?                                                                                   | Adaptation                              | Recommendations | Global        |                                                             | Scenarios/projections    | Socio-economic             | Waste                           | 10.1111/jiec.1<br>2165                     |
| 206 | Kergomard, C.                                                                                                                                                     | 2015 | Resilience and Global<br>Climate Change                                                                                      | Adaptation                              | Recommendations | Global        |                                                             | *NR                      | Socio-economic             | Resilience                      | 10.1016/B978<br>-1-78548-051-<br>5.50007-3 |
| 209 | Le Cozannet, G.,<br>Rohmer, J.,<br>Cazenave, A., Idier,<br>D., van de Wal, R.,<br>de Winter, R.,<br>Pedreros, R.,<br>Balouin, Y.,<br>Vinchon, C.,<br>Oliveros, C. | 2015 | Evaluating uncertainties<br>of future marine flooding<br>occurrence as sea-level<br>rises                                    | Adaptation                              | Recommendations | Local         | Lion,<br>France                                             | Model                    | Sea level<br>rise/flooding | Flooding                        | 10.1016/j.env<br>soft.2015.07.0<br>21      |
| 214 | Means, P.,<br>Guggemos, A.                                                                                                                                        | 2015 | Framework for Life Cycle<br>Assessment (LCA) Based<br>Environmental Decision<br>Making during the<br>Conceptual Design Phase | Mitigation                              | Recommendations | National      | Los<br>Angeles,<br>San<br>Francisco,<br>Seattle,<br>Denver, | Life cycle<br>assessment | Socio-economic             | Commercial<br>buildings         | 10.1016/j.pro<br>eng.2015.08.5<br>17       |

|     |                                                           |      |                                                                                                                                                          |            |                 |               |                                                                         |                        |                |                        |                          |
|-----|-----------------------------------------------------------|------|----------------------------------------------------------------------------------------------------------------------------------------------------------|------------|-----------------|---------------|-------------------------------------------------------------------------|------------------------|----------------|------------------------|--------------------------|
|     |                                                           |      | for Commercial Buildings                                                                                                                                 |            |                 |               | Austin, Chicago, Philadelphia and New York City- USA                    |                        |                |                        |                          |
| 216 | Mohareb, E., Bristow, D., Derrible, S.                    | 2015 | Climate change mitigation in high-income cities                                                                                                          | Mitigation | Recommendations | International | New York, Vancouver, Paris, Boston, Seattle, Stockholm, Toronto, London | *NR                    | Socio-economic | High-income cities     | 10.4324/9781315849256-38 |
| 217 | Muñoz Meléndez, G., Vázquez González, L. B                | 2015 | Characterization of Greenhouse Gases Emissions from Urban Solid Waste in Baja California: A Proposal to Incorporate Technical Input into Decision-Making | Mitigation | Recommendations | Local         | Baja California, USA                                                    | IPCC methodology       | Socio-economic | Urban waste management | *NR                      |
| 220 | Qu, J., Maraseni, T., Liu, L., Zhang, Z., Yusaf, T.       | 2015 | A Comparison of Household Carbon Emission Patterns of Urban and Rural China over the 17 Year Period (1995-2011)                                          | Mitigation | Recommendations | National      | China                                                                   | Descriptive statistics | Air quality    | Pollution-CO2          | 10.3390/en80910537       |
| 222 | Schweikert, A., Espinet, X., Goldstein, S., Chinowsky, P. | 2015 | Resilience versus risk: Assessing cost of climate change adaptation to California's transportation system and the City of Sacramento, California         | Adaptation | Recommendations | National      | California and Sacramento city                                          | Model                  | Socio-economic | Transportation         | 10.3141/2532-02          |



|     |                                                                                             |      |                                                                                                                                                                    |            |                 |          |                       |                       |                         |                       |                                  |
|-----|---------------------------------------------------------------------------------------------|------|--------------------------------------------------------------------------------------------------------------------------------------------------------------------|------------|-----------------|----------|-----------------------|-----------------------|-------------------------|-----------------------|----------------------------------|
| 225 | Sperotto, A.,<br>Torresan, S.,<br>Gallina, V.,<br>Coppola, E., Critto,<br>A., Marcomini, A. | 2015 | A multi-disciplinary approach to evaluate pluvial floods risk under changing climate: The case study of the municipality of Venice (Italy)                         | Adaptation | Recommendations | Local    | Venice, Italy         | IPCC methodology      | Sea level rise/flooding | Flooding              | 10.1016/j.scitotenv.2016.03.150  |
| 226 | Spizzichino, D.,<br>Capriolo, A., Gioia,<br>F. D.                                           | 2015 | Climate change, landslide risk assessment and adaptation policies: The urban area of ancona municipality                                                           | Adaptation | Recommendations | Local    | Ancona, Italy         | IPCC methodology      | Socio-economic          | Landslide risk        | 10.1007/978-3-319-09048-1_159    |
| 227 | Spokas, K., Bogner, J.,<br>Corcoran, M., Walker, S.                                         | 2015 | From California dreaming to California data: Challenging historic models for landfill CH4 emissions                                                                | Mitigation | Recommendations | Local    | California, USA       | Model                 | Air quality             | Pollution             | 10.12952/journal.elementa.000051 |
| 228 | Strader, S. M. ,<br>Ashley, W., Walker, J.                                                  | 2015 | Changes in volcanic hazard exposure in the Northwest USA from 1940 to 2100                                                                                         | Mitigation | Recommendations | National | USA                   | Scenarios/projections | Socio-economic          | Volcanic hazard       | 10.1007/s11069-015-1658-1        |
| 231 | Tonmoy, F. N.,<br>Brown, M., Polydoropoulos, P.,<br>El-Zein, A.                             | 2015 | A comparative analysis of engineering options for adaptation to sea-level rise: A case study for a vulnerable beach in Shoalhaven NSW                              | Adaptation | Recommendations | Local    | Shoalhaven, Australia | Model                 | Sea level rise/flooding | Sea level rise        | *NR                              |
| 232 | Wagner, P. D.,<br>Reichenau, T. G.,<br>Kumar, S., Schneider, K.                             | 2015 | Development of a new downscaling method for hydrologic assessment of climate change impacts in data scarce regions and its application in the Western Ghats, India | Adaptation | Recommendations | Local    | Pune, India           | Scenarios/projections | Socio-economic          | Hydrologic assessment | 10.1007/s10113-013-0481-z        |

|     |                                                                                                                                                                                         |      |                                                                                                                 |            |                 |          |                                                                                             |                          |                         |                               |                              |
|-----|-----------------------------------------------------------------------------------------------------------------------------------------------------------------------------------------|------|-----------------------------------------------------------------------------------------------------------------|------------|-----------------|----------|---------------------------------------------------------------------------------------------|--------------------------|-------------------------|-------------------------------|------------------------------|
| 233 | Wamsler, C.                                                                                                                                                                             | 2015 | Mainstreaming ecosystem-based adaptation: Transformation toward sustainability in urban governance and planning | Adaptation | Recommendations | National | Munich, Nürnberg, Regensburg, Würzburg, Landshut, Passau, Deggendorf, and Freising, Germany | Content analysis         | Socio-economic          | Urban governance and planning | 10.5751/ES-07489-200230      |
| 234 | Wang, Z., Zhao, L., Mao, G., Wu, B.                                                                                                                                                     | 2015 | Factor decomposition analysis of energy-related CO2 emissions in Tianjin, China                                 | Mitigation | Recommendations | Local    | Tianjin, China                                                                              | IPCC methodology         | Air quality             | Pollution-CO2                 | 10.3390/su7089973            |
| 235 | Wenjun, M., Lin, H., Liu, T., Jianpeng, X., Yuan, L., Cunrui, H., Qiyong, L., Chu, C., Weilin, Z., Mengjue, H., Xuejie, G., Keralis, J. M., Onyango, E., Opitz-Stapleton, S., Nadin, R. | 2015 | Human health, well-being and climate change in China                                                            | Mitigation | Recommendations | Local    | Guangdon, China                                                                             | Survey and participatory | Health                  | Mortality                     | 10.4324/9781315744988-20     |
| 236 | Wong, P. P., Losada, I. J., Gattuso, J. P., Hinkel, J., Khattabi, A., McInnes, K. L., Saito, Y., Sallenger, A., Nicholls, R. J., Santos, F., Amez, S.                                   | 2015 | Coastal systems and low-lying areas                                                                             | Adaptation | Recommendations | Global   |                                                                                             | Scenarios/projections    | Sea level rise/flooding | Sea level rise                | 10.1017/CBO9781107415379.010 |

|     |                                                                            |      |                                                                                                                                       |                 |                 |               |                                    |                          |                         |                                         |                               |
|-----|----------------------------------------------------------------------------|------|---------------------------------------------------------------------------------------------------------------------------------------|-----------------|-----------------|---------------|------------------------------------|--------------------------|-------------------------|-----------------------------------------|-------------------------------|
| 239 | Yu, H., Pan, S. Y., Tang, B. J., Mi, Z. F., Zhang, Y., Wei, Y. M.          | 2015 | Urban energy consumption and CO2 emissions in Beijing: current and future                                                             | Mitigation      | Recommendations | Local         | Beijing, China                     | Model                    | Air quality             | Pollution-CO2                           | 10.1007/s12053-014-9305-3     |
| 242 | Zhao, Q. Z., Yan, Q. Y.                                                    | 2015 | Carbon Emissions Decomposition Analysis of Yangtze River Delta Area in China: 2001-2012                                               | Mitigation      | Recommendations | National      | Shanghai, Zhejiang, Jiangsu, China | Model                    | Socio-economic          | Energy consumption and carbon emissions | *NR                           |
| 243 | Abadie, L. M., de Murieta, E. S., Galarraga, I.                            | 2016 | Climate risk assessment under uncertainty: An application to main European coastal cities                                             | Adaptation      | Recommendations | International | European cities                    | Model                    | Sea level rise/flooding | Sea level rise                          | 10.3389/fmars.2016.00265      |
| 244 | Alves, C. A., Duarte, D. H. S., Gonçalves, F. L. T.                        | 2016 | Residential buildings' thermal performance and comfort for the elderly under climate changes context in the city of São Paulo, Brazil | Adaptation      | Recommendations | Local         | São Paulo, Brazil                  | Survey and participatory | Extreme temperature     | Thermal comfort                         | 10.1016/j.enbuid.2015.06.044  |
| 245 | Araya-Muñoz, D., Metzger, M. J., Stuart, N., Wilson, A. M. W., Alvarez, L. | 2016 | Assessing urban adaptive capacity to climate change                                                                                   | Adaptation      | Recommendations | Local         | Concepción, Chile                  | Model                    | Socio-economic          | Urban adaptive capacity                 | 10.1016/j.jenvman.2016.08.060 |
| 246 | Babel, S., Vilaysouk, X.                                                   | 2016 | Greenhouse gas emissions from municipal solid waste management in Vientiane, Lao PDR                                                  | Mitigation      | Recommendations | Local         | Vientiane, Laos                    | IPCC methodology         | Air quality             | Pollution-CO2, CH4, N2O                 | 10.1177/0734242X15615425      |
| 247 | Bartlett, S., Satterthwaite, D.                                            | 2016 | Cities on a finite planet: Towards transformative responses to climate change                                                         | Mitigation      | Recommendations | Without scale |                                    | *NR                      | Socio-economic          | Cities                                  | 10.4324/9781315645421         |
| 248 | Binti Sa'adin, S. L., Kaewunruen, S., Jaroszweski, D.                      | 2016 | Heavy rainfall and flood vulnerability of                                                                                             | Both adaptation | Recommendations | International | Singapore, Malaysia                | *NR                      | Sea level rise/flooding | Flood vulnerability                     | 10.1080/14488353.2017.1336895 |

|     |                                                                             |      |                                                                                                                                                   |                |                 |               |                                                                                                          |                       |                |                                                      |                               |
|-----|-----------------------------------------------------------------------------|------|---------------------------------------------------------------------------------------------------------------------------------------------------|----------------|-----------------|---------------|----------------------------------------------------------------------------------------------------------|-----------------------|----------------|------------------------------------------------------|-------------------------------|
|     |                                                                             |      | Singapore-Malaysia high speed rail system                                                                                                         | and mitigation |                 |               |                                                                                                          |                       |                |                                                      |                               |
| 249 | Cantos, J. O., Vera-Rebollo, J. F.                                          | 2016 | Adaptation of the tourism sector to climate change in Spain. The importance of action at local level and in tourism businesses                    | Mitigation     | Recommendations | National      | Spain                                                                                                    | *NR                   | Socio-economic | Tourism                                              | 10.5209/AG UC.53588           |
| 250 | Chow, D. H. C., Sharples, S.                                                | 2016 | The feasibility of retrofitting existing office buildings to combat energy consumption due to future climate change in three key regions of China | Mitigation     | Recommendations | National      | Beijing, Shanghai and Guangzhou, China                                                                   | Scenarios/projections | Socio-economic | Energy consumption                                   | 10.1201/b19239-25             |
| 253 | Darela Filho, J. P., Lapola, D. M., Torres, R. R., Lemos, M. C.             | 2016 | Socio-climatic hotspots in Brazil: how do changes driven by the new set of IPCC climatic projections affect their relevance for policy?           | Adaptation     | Recommendations | National      | Belo Horizonte, Brasília, Salvador, Manaus, Rio de Janeiro and São Paulo, Minas Gerais and Bahia, Brazil | Scenarios/projections | Socio-economic | Vulnerability to climate impacts                     | 10.1007/s10584-016-1635-z     |
| 254 | Erickson, P., Morgenstern, T.                                               | 2016 | Fixing greenhouse gas accounting at the city scale                                                                                                | Mitigation     | Recommendations | Global        |                                                                                                          | *NR                   | Air quality    | Outdoor pollution- CO <sub>2</sub> , CH <sub>4</sub> | 10.1080/17583004.2016.1238743 |
| 256 | Gouldson, A., Colenbrander, S., Sudmant, A., Papargyropoulou, E., Kerr, N., | 2016 | Cities and climate change mitigation: Economic opportunities and governance challenges in Asia                                                    | Mitigation     | Recommendations | International | Kolkata in India, Palembang in Indonesia                                                                 | *NR                   | Socio-economic | Cities                                               | 10.1016/j.cities.2015.10.010  |

|     |                                                                                                            |      |                                                                                                                          |            |                 |          |                                          |                        |                         |                             |                              |
|-----|------------------------------------------------------------------------------------------------------------|------|--------------------------------------------------------------------------------------------------------------------------|------------|-----------------|----------|------------------------------------------|------------------------|-------------------------|-----------------------------|------------------------------|
|     | McAnulla, F., Hall, S.                                                                                     |      |                                                                                                                          |            |                 |          | and Johor Bahru in Malaysia              |                        |                         |                             |                              |
| 257 | He, Y. H., Mok, H. Y., Lai, E. S. T.                                                                       | 2016 | Projection of sea-level change in the vicinity of Hong Kong in the 21st century                                          | Adaptation | Recommendations | Local    | Hong Kong, China                         | Model                  | Sea level rise/flooding | Sea level rise              | 10.1002/joc.4551             |
| 258 | Hoeppe, P.                                                                                                 | 2016 | Trends in weather related disasters - Consequences for insurers and society                                              | Adaptation | Recommendations | Global   |                                          | Descriptive statistics | Socio-economic          | Disasters                   | 10.1016/j.wace.2015.10.002   |
| 259 | Holden, M., Robinson, J., Sheppard, S.                                                                     | 2016 | From Resilience to Transformation Via a Regenerative Sustainability Development Path                                     | Adaptation | Recommendations | Global   |                                          | *NR                    | Socio-economic          | Urban resilience            | 10.1007/978-3-319-39812-9_15 |
| 260 | Hovenga, P. A., Wang, D., Medeiros, S. C., Hagen, S. C., Alizad, K.                                        | 2016 | The response of runoff and sediment loading in the Apalachicola River, Florida to climate and land use land cover change | Mitigation | Recommendations | National | U.S.A                                    | IPCC methodology       | Socio-economic          | Runoff and sediment loading | 10.1002/2015EF000348         |
| 261 | Hsu, M. H., Chen, C. H., Liu, W. C., Chang, T. J., Chen, A. S., Hammond, M. J., Djordjević, S., Butler, D. | 2016 | Evaluation of Adaptation Strategies for Urban Flooding in Central Taipei City in Taiwan                                  | Adaptation | Recommendations | Local    | Taipei, Taiwan                           | Model                  | Sea level rise/flooding | Flood risk                  | 10.1007/978-981-287-615-7_7  |
| 262 | Invidiata, A., Ghisi, E.                                                                                   | 2016 | Impact of climate change on heating and cooling energy demand in houses in Brazil                                        | Mitigation | Recommendations | National | Curitiba, Florianópolis and Belém-Brazil | Model                  | Extreme temperature     | Thermal comfort             | 10.1016/j.enbuid.2016.07.067 |

|     |                                                                           |      |                                                                                                                              |            |                 |               |                          |                       |                         |                            |                           |
|-----|---------------------------------------------------------------------------|------|------------------------------------------------------------------------------------------------------------------------------|------------|-----------------|---------------|--------------------------|-----------------------|-------------------------|----------------------------|---------------------------|
| 263 | José, R. S., Pérez, J. L., Pérez, L., Pecci, J., Garzón, A., Palacios, M. | 2016 | Impacts of global climate scenarios over three european cities using mesoscale and cfd simulations with very high resolution | Mitigation | Recommendations | International | Madrid, London and Milan | Model                 | Health                  | Mortality and morbidity    | *NR                       |
| 265 | Lassa, J. A., Lai, A. Y. H., Goh, T.                                      | 2016 | Climate extremes: an observation and projection of its impacts on food production in ASEAN                                   | Adaptation | Recommendations | International | Asian countries          | *NR                   | Socio-economic          | Food security              | 10.1007/s11069-015-2081-3 |
| 267 | Maraseni, T. K., Qu, J., Zeng, J., Liu, L.                                | 2016 | An Analysis of Magnitudes and Trends of Household Carbon Emissions in China Between 1995 and 2011                            | Mitigation | Recommendations | National      | China                    | Model                 | Socio-economic          | Household carbon emissions | *NR                       |
| 268 | Maraseni, T. N., Qu, J., Yue, B., Zeng, J., Maroulis, J.                  | 2016 | Dynamism of household carbon emissions (HCEs) from rural and urban regions of northern and southern China                    | Adaptation | Recommendations | National      | China                    | Scenarios/projections | Air quality             | Poollution-CO2             | 10.1007/s11356-016-7237-5 |
| 269 | Martínez-Austria, P. F., Bandala, E. R., Patiño-Gómez, C.                 | 2016 | Temperature and heat wave trends in northwest Mexico                                                                         | Adaptation | Recommendations | National      | Mexicali, Sonora, Mexico | Model                 | Extreme temperature     | Heat                       | 10.1016/j.pce.2015.07.005 |
| 270 | Monprapussorn, S.                                                         | 2016 | Climate change impact on water resources in agricultural and adaptation: A case study of Kanchanaburi province, Thailand     | Adaptation | Recommendations | Local         | Kanchanaburi, Thailand   | Scenarios/projections | Socio-economic          | Water resources            | *NR                       |
| 274 | Park, J., Kang, M. S., Song, I., Song, J. H., Jun, S. M.                  | 2016 | Probabilistic risk assessment of flood disaster in South Korea under the impact of climate change                            | Adaptation | Recommendations | National      | South Korea              | Model                 | Sea level rise/flooding | Flooding                   | 10.1002/ird.2049          |

|     |                                                                                                          |      |                                                                                                                                                          |            |                                 |               |                                                                       |                       |                |                                                                                     |                              |
|-----|----------------------------------------------------------------------------------------------------------|------|----------------------------------------------------------------------------------------------------------------------------------------------------------|------------|---------------------------------|---------------|-----------------------------------------------------------------------|-----------------------|----------------|-------------------------------------------------------------------------------------|------------------------------|
| 276 | Rangecroft, S., Suggitt, A. J., Anderson, K., Harrison, S.                                               | 2016 | Future climate warming and changes to mountain permafrost in the Bolivian Andes                                                                          | Adaptation | Recommendations                 | National      | Bolivia                                                               | Scenarios/projections | Socio-economic | Permafrost                                                                          | 10.1007/s10584-016-1655-8    |
| 277 | Rosatto, H., Botta, G. F., Becerra, A. T., Tardito, H., Leveratto, M.                                    | 2016 | Climate change difficulties in the Buenos Aires city contribution of green roofs in regulating the thermal change                                        | Mitigation | Specific evidence (green roofs) | Local         | Buenos Aires, Argentina                                               | *NR                   | Socio-economic | Thermal change of building                                                          | *NR                          |
| 279 | Rowntree, J. E., Ryals, R., DeLonge, M. S., Teague, W. R., Chiavegato, M. B., Byck, P., Wang, T., Xu, S. | 2016 | Potential mitigation of midwest grass-finished beef production emissions with soil carbon sequestration in the United States of America                  | Mitigation | Recommendations                 | Local         | Michigan, USA                                                         | Model                 | Air quality    | Pollution                                                                           | *NR                          |
| 280 | San José, R., Pérez, J. L., González, R. M., Pecci, J., Garzón, APalacios, M.                            | 2016 | Impacts of the 4.5 and 8.5 RCP global climate scenarios on urban meteorology and air quality: Application to Madrid, Antwerp, Milan, Helsinki and London | Mitigation | Recommendations                 | International | Madrid, Antwerp, Milan, Helsinki and London (Kensington-Chelsea area) | Model                 | Air quality    | Pollution-SO <sub>2</sub> , NO <sub>2</sub> , CO, O <sub>3</sub> , PM <sub>10</sub> | 10.1016/j.cam.2015.04.024    |
| 281 | Santarius, T., Walnum, H. J., Aall, C.                                                                   | 2016 | Rethinking climate and energy policies: New perspectives on the rebound phenomenon                                                                       | Mitigation | Recommendations                 | Global        |                                                                       | *NR                   | Socio-economic | Climate change and energy policies                                                  | 10.1007/978-3-319-38807-6    |
| 282 | Sima, M., Micu, D., Bălțeanu, D., Dragotă, C., Mihalache, S.                                             | 2016 | Climate change projections for a medium-size urban area (baia mare town, romania): Local                                                                 | Adaptation | Recommendations                 | Local         | Baia Mare, Romania                                                    | Scenarios             | Socio-economic | Climate change awareness                                                            | 10.1007/978-3-319-28591-7_16 |

|     |                                                                                                                                                                                                                                                 |      |                                                                                                                                                               |            |                 |          |                                                   |                       |                         |                         |                                    |
|-----|-------------------------------------------------------------------------------------------------------------------------------------------------------------------------------------------------------------------------------------------------|------|---------------------------------------------------------------------------------------------------------------------------------------------------------------|------------|-----------------|----------|---------------------------------------------------|-----------------------|-------------------------|-------------------------|------------------------------------|
|     |                                                                                                                                                                                                                                                 |      | awareness and adaptation constraints                                                                                                                          |            |                 |          |                                                   |                       |                         |                         |                                    |
| 285 | Talukdar, S.,<br>Banthia, N.                                                                                                                                                                                                                    | 2016 | Carbonation in Concrete Infrastructure in the Context of Global Climate Change: Model Refinement and Representative Concentration Pathway Scenario Evaluation | Mitigation | Recommendations | National | Los Angeles, Houston, Chicago, New York City, USA | Model                 | Socio-economic          | Concrete infrastructure | 10.1061/(asce)mt.1943-5533.0001438 |
| 286 | Tong, S. T. Y.,<br>Yang, H., Chen, H.,<br>Yang, J. Y.                                                                                                                                                                                           | 2016 | Hydrologic impacts of climate change and urbanization in the Las Vegas Wash Watershed, Nevada                                                                 | Mitigation | Recommendations | Local    | Las Vegas, USA                                    | Model                 | Socio-economic          | Watershed               | 10.2166/wcc.2016.038               |
| 287 | Tumini, I., Rubio-Bellido, C.                                                                                                                                                                                                                   | 2016 | Measuring climate change impact on urban microclimate: A case study of Concepción                                                                             | Adaptation | Recommendations | Local    | Concepción, Chile                                 | Scenarios/projections | Socio-economic          | Urban microclimate      | 10.1016/j.proeng.2016.08.830       |
| 288 | Uddin, W.                                                                                                                                                                                                                                       | 2016 | Mobile and area sources of greenhouse gases and abatement strategies                                                                                          | Adaptation | Recommendations | Global   |                                                   | *NR                   | Air quality             | Pollution-CO2           | 10.1007/978-3-319-14409-2_23       |
| 289 | Wang, C. H.,<br>Baynes, T.,<br>McFallan, S., West, J.,<br>Khoo, Y. B.,<br>Wang, X., Quezada, G.,<br>Mazouz, S.,<br>Herr, A., Beaty, R. M.,<br>Langston, A., Li, Y.,<br>Wai Lau, K.,<br>Hatfield-Dodds, S.,<br>Stafford-Smith, M.,<br>Waring, A. | 2016 | Rising tides: adaptation policy alternatives for coastal residential buildings in Australia                                                                   | Adaptation | Recommendations | National | Australia                                         | Scenarios/projections | Sea level rise/flooding | Rising tides            | 10.1080/15732479.2015.1020500      |



|     |                                                                                                                            |      |                                                                                                                                                              |            |                 |          |                          |                       |                |                           |                                |
|-----|----------------------------------------------------------------------------------------------------------------------------|------|--------------------------------------------------------------------------------------------------------------------------------------------------------------|------------|-----------------|----------|--------------------------|-----------------------|----------------|---------------------------|--------------------------------|
| 290 | Yang, X., Ma, C., Zhang, A.                                                                                                | 2016 | Decomposition of net CO2 emission in the Wuhan Metropolitan Area of Central China                                                                            | Mitigation | Recommendations | Local    | Wuhan, China             | IPCC methodology      | Air quality    | Pollution-CO2             | 10.3390/su8080784              |
| 292 | Ahsan, S. H., Manjang, S., Syafaruddin; M. B.                                                                              | 2017 | Potential of renewable energy from waste mitigation of gas emissions of CH4 and CO2 in Bontang City, East Borneo                                             | Mitigation | Recommendations | Local    | Bontang, Indonesia       | IPCC methodology      | Socio-economic | Renewable energy          | 10.1109/ICS GSC.2017.8038540   |
| 293 | Asadollahfardi, G., Panahandeh, A., Khalvati, A. A., Sekhavati, A.                                                         | 2017 | Life cycle assessment of construction phase of monorail project in Qom, Iran                                                                                 | Mitigation | Recommendations | Local    | Qom, Iran                | Life cycle assessment | Socio-economic | Acid raining              | 10.7508/pj.2017.01.009         |
| 294 | Bahrum, N. A., Malek, M. A., Tan, C. S.                                                                                    | 2017 | Greenhouse Gas Emission Estimation for Selected Crops and Rice Cultivation in Urban and Non-Urban Areas of Sarawak                                           | Mitigation | Recommendations | Local    | Sarawak, Malaysia        | IPCC methodology      | Air quality    | Pollution-CO2             | 10.1051/mateconf/201710305006  |
| 297 | Burillo, D., Chester, M. V., Ruddell, B., Johnson, N.                                                                      | 2017 | Electricity demand planning forecasts should consider climate non-stationarity to maintain reserve margins during heat waves                                 | Mitigation | Recommendations | National | Phoenix, Los Angeles-USA | Model                 | Socio-economic | Electricity demand        | 10.1016/j.apenergy.2017.08.141 |
| 298 | Cambaliza, M. O. L., Bogner, J. E., Green, R. B., Shepson, P. B., Harvey, T. A., Spokas, K. A., Stirm, B. H., Corcoran, M. | 2017 | Field measurements and modeling to resolve m <sup>2</sup> to km <sup>2</sup> CH <sub>4</sub> emissions for a complex urban source: An Indiana landfill study | Adaptation | Recommendations | Local    | Indiana, USA             | Model                 | Air quality    | Pollution-CH <sub>4</sub> | 10.1525/elementa.145           |

|     |                                                                                                  |      |                                                                                                                   |            |                 |               |                                                                                                 |                  |                         |                  |                                       |
|-----|--------------------------------------------------------------------------------------------------|------|-------------------------------------------------------------------------------------------------------------------|------------|-----------------|---------------|-------------------------------------------------------------------------------------------------|------------------|-------------------------|------------------|---------------------------------------|
| 300 | Cheng, C., E. Yang, Y. C., Ryan, R., Yu, Q., Brabec, E.                                          | 2017 | Assessing climate change-induced flooding mitigation for adaptation in Boston's Charles River watershed, USA      | Mitigation | Recommendations | Local         | Boston, USA                                                                                     | Model            | Sea level rise          | Flooding         | 10.1016/j.lan<br>durbplan.2017.05.019 |
| 302 | da Lio, C., Strozzi, T., Teatini, P., Tosi, L.                                                   | 2017 | Computing the relative land subsidence at Venice, Italy, over the last fifty years                                | Mitigation | Recommendations | Local         | Venice, Italy                                                                                   | Model            | Sea level rise/flooding | Land subsidence  | *NR                                   |
| 304 | Herrera-Murillo, J., Rojas-Marin, J. F., Quiros-Fallas, A., Balma-Montero, C., Anchia-Leiton, D. | 2017 | Greenhouse gas emissions inventories as a tool that supports the climate change local agenda: San Jose experience | Mitigation | Recommendations | Local         | San Jose, Costa Rica                                                                            | Model            | Air quality             | Pollution-CO2    | 10.15359/rga<br>c.58-1.6              |
| 306 | Lee, Y. C., Ko, C. Y., Lin, Y. T., Wang, C. Y., Huang, C. W., Seto, K. C.                        | 2017 | A Conceptual Framework of the Human Dimensions of Urban Emission in East Asia Cities                              | Mitigation | Recommendations | International | East Asian countries-Taiwan, Japan, South Korea, China, Macau, Hong Kong, Singapore and Vietnam | *NR              | Socio-economic          | Urban form       | 10.1016/j.pro<br>eng.2017.07.123      |
| 307 | Lee, Y. J.                                                                                       | 2017 | Building resilient cities through community empowerment: Principles and strategies for Taiwan                     | Adaptation | Recommendations | National      | Taiwan                                                                                          | *NR              | Socio-economic          | Resilient cities | 10.14246/irsp<br>sd.5.2_35            |
| 308 | Li, Y., Qian, X., Zhang, L., Dong, L.                                                            | 2017 | Exploring spatial explicit greenhouse gas inventories: Location-                                                  | Mitigation | Recommendations | Local         | Oita, Japan                                                                                     | IPCC methodology | Socio-economic          | GHG inventories  | 10.1016/j.jcle<br>pro.2017.08.219     |

|     |                                                                                                                   |      |                                                                                                                                |            |                 |          |                                              |                          |                     |                           |                                 |
|-----|-------------------------------------------------------------------------------------------------------------------|------|--------------------------------------------------------------------------------------------------------------------------------|------------|-----------------|----------|----------------------------------------------|--------------------------|---------------------|---------------------------|---------------------------------|
|     |                                                                                                                   |      | based accounting approach and implications in Japan                                                                            |            |                 |          |                                              |                          |                     |                           |                                 |
| 309 | Liu, J., Li, J., Qin, K., Zhou, Z., Yang, X., Li, T.                                                              | 2017 | Changes in land-uses and ecosystem services under multi-scenarios simulation                                                   | Mitigation | Recommendations | Local    | Guanzhong-Tianshui, China                    | Scenarios/projections    | Socio-economic      | Land use change           | 10.1016/j.scitotenv.2017.02.005 |
| 310 | Llorach-Massana, P., Munoz, P., Rosa Riera, M., Gabarrell, X., Rieradevall, J., Ignacio Montero, J., Villalba, G. | 2017 | N <sub>2</sub> O emissions from protected soilless crops for more precise food and urban agriculture life cycle assessments    | Mitigation | Recommendations | Local    | Barcelona, Spain                             | Experiment/laboratory    | Socio-economic      | Soilless crops            | 10.1016/j.jclepro.2017.02.191   |
| 311 | Miphokasap, P.                                                                                                    | 2017 | Spatial inventory of CO <sub>2</sub> emissions and removals from land use and land use changes in Thailand                     | Mitigation | Recommendations | National | Thailand                                     | IPCC methodology         | Air quality         | Pollution-CO <sub>2</sub> | 10.3303/CET1756003              |
| 312 | Neht, A., Maximini, C., Prenger-Berninghoff, K.                                                                   | 2017 | Heat Retreat Locations in Cities - The Survey-Based Location Analysis of Heat Relief                                           | Adaptation | Recommendations | National | German cities                                | Survey and participatory | Extreme temperature | Heat                      | 10.1088/1755-1315/95/5/052006   |
| 313 | Neht, A., Prenger-Berninghoff, K., Vallée, D.                                                                     | 2017 | Implementing heat-related adaptation measures in the tri-city area bergischesstädtedreieck                                     | Adaptation | Recommendations | National | Remscheid, Solingen, and Wuppertal - Germany | IPCC methodology         | Extreme temperature | Thermal/heat stress       | 10.1007/978-3-319-58214-6_12    |
| 314 | Oh, K. Y., Lee, M. J., Jeon, S. W.                                                                                | 2017 | Development of the Korean climate change vulnerability assessment tool (VESTAP)-centered on health vulnerability to heat waves | Adaptation | Recommendations | National | Korea, Daegu, and Seogang, Daegu             | IPCC methodology         | Health              | Health                    | 10.3390/su9071103               |

|     |                                                                                        |      |                                                                                                                                                                      |                                |                 |               |                                                                        |                       |                         |                    |                               |
|-----|----------------------------------------------------------------------------------------|------|----------------------------------------------------------------------------------------------------------------------------------------------------------------------|--------------------------------|-----------------|---------------|------------------------------------------------------------------------|-----------------------|-------------------------|--------------------|-------------------------------|
| 315 | Palme, M., Lobato, A.                                                                  | 2017 | Robustness of residential houses in Ecuador in the face of global warming: Prototyping and simulation studies in the Amazon, coastal and Andes macroclimatic regions | Both adaptation and mitigation | Recommendations | National      | Ecuador                                                                | IPCC methodology      | Socio-economic          | Residential houses | 10.1007/978-3-319-30746-6_31  |
| 316 | Perini, L., Calabrese, L., Luciani, P., Olivieri, M., Galassi, G., Spada, G.           | 2017 | Sea-level rise along the Emilia-Romagna coast (Northern Italy) in 2100: Scenarios and impacts                                                                        | Mitigation                     | Recommendations | Local         | Emilia-Romagna, Italy                                                  | Scenarios/projections | Sea level rise/flooding | Sea level rise     | 10.5194/nhess-17-2271-2017    |
| 317 | Raharjo, S.                                                                            | 2017 | Development of 3r waste treatment facilities for mitigating greenhouse gas emissions: A case study of Padang city, Indonesia                                         | Mitigation                     | Recommendations | Local         | Padang, Indonesia                                                      | Life cycle assessment | Socio-economic          | Waste treatment    | *NR                           |
| 318 | Raharjo, S., Junaidi, N. E., Bachtiar, V. S., Ruslinda, Y., Rachman, I., Matsumoto, T. | 2017 | Development of community-based waste recycling (garbage bank and 3R waste treatment facility) for mitigating greenhouse gas emissions in Padang City, Indonesia      | Mitigation                     | Recommendations | Local         | Padang, Indonesia                                                      | Life cycle assessment | Socio-economic          | Waste recycling    | 10.1109/MITI CON.2016.8025259 |
| 320 | Rasmussen, K., Thyrring, J., Muscarella, R., Borchsenius, F.                           | 2017 | Climate-change-induced range shifts of three allergenic ragweeds (Ambrosia L.) in Europe and their potential impact on human health                                  | Mitigation                     | Recommendations | International | Denmark, France, Germany, Russia and the Baltic countries, and overlap | Model                 | Health                  | Human health       | 10.7717/peerj.3104            |

|     |                                                                                                              |      |                                                                                                    |            |                 |          |                                                                |                  |                         |                     |                               |
|-----|--------------------------------------------------------------------------------------------------------------|------|----------------------------------------------------------------------------------------------------|------------|-----------------|----------|----------------------------------------------------------------|------------------|-------------------------|---------------------|-------------------------------|
|     |                                                                                                              |      |                                                                                                    |            |                 |          | with densely populated cities such as Paris and St. Petersburg |                  |                         |                     |                               |
| 321 | Rubio-Bellido, C., Pérez-Fargallo, A., Pulido-Arcas, J. A.                                                   | 2017 | Study on envelope in office buildings under the influence of climate change in Santiago, Chile     | Adaptation | Recommendations | Local    | Santiago, Chile                                                | Model            | Socio-economic          | Office buildings    | 10.1007/978-3-319-51442-0_32  |
| 323 | Scussolini, P., Tran, T. T. V., Koks, E., Diaz-Loaiza, A., Ho, P. L., Lasage, R.                             | 2017 | Adaptation to Sea Level Rise: A Multidisciplinary Analysis for Ho Chi Minh City, Vietnam           | Adaptation | Recommendations | Local    | Ho Chi Minh, Vietnam                                           | Model            | Sea level rise/flooding | Flooding            | 10.1002/2017WR021344          |
| 324 | Shan, Y., Guan, D., Liu, J., Mi, Z., Liu, Z., Liu, J., Schroeder, H., Cai, B., Chen, Y., Shao, S., Zhang, Q. | 2017 | Methodology and applications of city level CO2 emission accounts in China                          | Mitigation | Recommendations | National | Chinese cities                                                 | IPCC methodology | Air quality             | Pollution-CO2       | 10.1016/j.jclepro.2017.06.075 |
| 325 | Shen, P.                                                                                                     | 2017 | Impacts of climate change on US building energy use by using downscaled hourly future weather data | Mitigation | Recommendations | National | Philadelphia, Chicago, Phoenix, Miami-USA                      | Model            | Socio-economic          | Building energy use | 10.1016/j.enbuid.2016.09.028  |
| 326 | Simane, B., Deressa, W., Kumie, A., Woyessa, A., Kaba, M., Taye, G., Berhane, G.                             | 2017 | Health Vulnerability and Adaptation Strategies to Climate Change in Ethiopia                       | Adaptation | Recommendations | National | Ethiopia                                                       | IPCC methodology | Health                  | Human health        | 10.1007/978-3-319-49520-0_11  |

|     |                                                                                                         |      |                                                                                                                                         |            |                 |               |                                      |                       |                     |                                   |                                |
|-----|---------------------------------------------------------------------------------------------------------|------|-----------------------------------------------------------------------------------------------------------------------------------------|------------|-----------------|---------------|--------------------------------------|-----------------------|---------------------|-----------------------------------|--------------------------------|
| 328 | Spandagos, C., Ng, T. L.                                                                                | 2017 | Equivalent full-load hours for assessing climate change impact on building cooling and heating energy consumption in large Asian cities | Mitigation | Recommendations | International | Hong Kong, Seoul and Tokyo           | Scenarios/projections | Extreme temperature | Building heating and cooling      | 10.1016/j.apenergy.2016.12.039 |
| 330 | Vasenev, V. I., Stoorvogel, J. J., Dolgikh, A. V., Ananyeva, N. D., Ivashchenko, K. V., Valentini, R.   | 2017 | Changes in soil organic carbon stocks by urbanization                                                                                   | Adaptation | Recommendations | National      | Russia                               | Model                 | Socio-economic      | Urbanization                      | 10.1201/9781315154251          |
| 331 | Vázquez-Rowe, I., Larrea-Gallegos, G., Villanueva-Rey, P., Gilardino, A.                                | 2017 | Climate change mitigation opportunities based on carbon footprint estimates of dietary patterns in Peru                                 | Mitigation | Recommendations | National      | Peru                                 | Model                 | Socio-economic      | Dietary patterns                  | 10.1371/journal.pone.0188182   |
| 334 | Xie, M., Shu, L., Wang, T.-j., Liu, Q., Gao, D., Li, S., Zhuang, B.-l., Han, Y., Li, M.-m., Chen, P.-l. | 2017 | Natural emissions under future climate condition and their effects on surface ozone in the Yangtze River Delta region, China            | Mitigation | Recommendations | National      | Shanghai, Jiangsu and Zhejiang-China | Model                 | Air quality         | Pollution-NOX, O3, VOCs           | 10.1016/j.atmosenv.2016.11.053 |
| 335 | Yang, X., Lou, F., Sun, M., Wang, R., Wang, Y.                                                          | 2017 | Study of the relationship between greenhouse gas emissions and the economic growth of Russia based on the Environmental Kuznets Curve   | Mitigation | Recommendations | National      | Russia                               | Model                 | Socio-economic      | Economy-related GHG emission      | 10.1016/j.apenergy.2017.02.034 |
| 336 | Zhang, Q., Nakatani, J., Wang, T., Chai, C., Moriguchi, Y.                                              | 2017 | Hidden greenhouse gas emissions for water utilities in China's cities                                                                   | Mitigation | Recommendations | National      | China                                | IPCC methodology      | Socio-economic      | Water utilities and GHG emissions | 10.1016/j.jclepro.2017.06.042  |

|     |                                                                                               |      |                                                                                                                                                                                      |            |                 |               |                    |                  |                         |                                       |                               |
|-----|-----------------------------------------------------------------------------------------------|------|--------------------------------------------------------------------------------------------------------------------------------------------------------------------------------------|------------|-----------------|---------------|--------------------|------------------|-------------------------|---------------------------------------|-------------------------------|
| 337 | Abadie, L. M.                                                                                 | 2018 | Sea level damage risk with probabilistic weighting of IPCC scenarios: An application to major coastal cities                                                                         | Adaptation | Recommendations | International | 120 megacities     | Model            | Sea level rise/flooding | Sea level risk                        | 10.1016/j.jclepro.2017.11.069 |
| 338 | Ahsan, S. H., Manjang, S., Baharuddin, M. S.                                                  | 2018 | Potential electrical energy production using estimation of waste composition and realistic model of waste reduction                                                                  | Mitigation | Recommendations | Local         | Bontang, Indonesia | IPCC methodology | Air quality             | Pollution-CH4                         | 10.24507/ijicel.12.05.401     |
| 339 | Al-Maktoumi, A., Zekri, S., El-Rawy, M., Abdalla, O., Al-Wardy, M., Al-Rawas, G., Charabi, Y. | 2018 | Assessment of the impact of climate change on coastal aquifers in Oman                                                                                                               | Adaptation | Recommendations | National      | Oman               | Model            | Socio-economic          | Coastal aquifers                      | 10.1007/s12517-018-3858-y     |
| 340 | Amin, A., Iqbal, J., Asghar, A., Ribbe, L.                                                    | 2018 | Analysis of Current and Future Water Demands in the Upper Indus Basin under IPCC Climate and Socio-Economic Scenarios Using a Hydro-Economic WEAP Model                              | Adaptation | Recommendations | Local         | Indus, Pakistan    | Model            | Socio-economic          | Water demand                          | 10.3390/w10050537             |
| 344 | Campbell, P., Zhang, Y., Yan, F., Lu, Z., Streets, D.                                         | 2018 | Impacts of transportation sector emissions on future U.S. air quality in a changing climate. Part II: Air quality projections and the interplay between emissions and climate change | Mitigation | Recommendations | National      | USA                | Model            | Air quality             | Pollution-CO, VOCs, NOX, O3, NH3, SO2 | 10.1016/j.envpol.2018.03.016  |
| 345 | Carranza, V., Rafiq, T., Frausto-Vicencio, I., Hopkins, F. M., Verhulst, K.                   | 2018 | Vista-LA: Mapping methane-emitting infrastructure in the Los Angeles megacity                                                                                                        | Mitigation | Recommendations | Local         | Los Angeles, USA   | IPCC methodology | Air quality             | Pollution-CH4                         | 10.5194/essd-10-653-2018      |

|     |                                                                                                                   |      |                                                                                                                      |                                |                 |          |                                                   |                       |                         |                            |                                    |
|-----|-------------------------------------------------------------------------------------------------------------------|------|----------------------------------------------------------------------------------------------------------------------|--------------------------------|-----------------|----------|---------------------------------------------------|-----------------------|-------------------------|----------------------------|------------------------------------|
|     | R., Rao, P., Duren, R. M., Miller, C. E.                                                                          |      |                                                                                                                      |                                |                 |          |                                                   |                       |                         |                            |                                    |
| 346 | Carrizo Sineiro, C., Ferreyra, Y., Astudillo, D., Solda, S.                                                       | 2018 | Sustainability and risk management. Response, repair and prevention against floods from a case analysis              | Adaptation                     | Recommendations | Local    | Jesus Maria, Mexico                               | *NR                   | Sea level rise/flooding | Flooding                   | 10.17141/letrasverdes.24.2018.3328 |
| 348 | Chen, K., Fiore, A. M., Chen, R., Jiang, L., Jones, B., Schneider, A., Peters, A., Bi, J., Kan, H., Kinney, P. L. | 2018 | Future ozone-related acute excess mortality under climate and population change scenarios in China: A modeling study | Mitigation                     | Recommendations | National | China                                             | Scenarios/projections | Health                  | Mortality                  | 10.1371/journal.pmed.1002598       |
| 351 | da Silva, C. V. F., Schardong, A., Garcia, J. I. B., Oliveira, C. P. M.                                           | 2018 | Climate change impacts and flood control measures for highly developed urban watersheds                              | Mitigation                     | Recommendations | Local    | Sao Paulo, Brazil                                 | Scenarios/projections | Sea level rise/flooding | Flooding                   | 10.3390/w10070829                  |
| 352 | Feyissa, G., Zeleke, G., Gebremariam, E., Bewket, W.                                                              | 2018 | GIS based quantification and mapping of climate change vulnerability hotspots in Addis Ababa                         | Both adaptation and mitigation | Recommendations | Local    | Addis Ababa, Ethiopia                             | Model                 | Sea level rise/flooding | Flooding                   | 10.1186/s40677-018-0106-4          |
| 353 | Flörke, M., Schneider, C., McDonald, R. I.                                                                        | 2018 | Water competition between cities and agriculture driven by climate change and urban growth                           | Adaptation                     | Recommendations | Global   |                                                   | Model                 | Socio-economic          | Water competition          | 10.1038/s41893-017-0006-8          |
| 356 | Hu, N., Liu, S., Gao, Y., Xu, J., Zhang, X., Zhang, Z., Lee, X.                                                   | 2018 | Large methane emissions from natural gas vehicles in Chinese cities                                                  | Mitigation                     | Recommendations | National | Chengdu, Urumqi, Jinan, Nanjing, Lanzhou, Harbin, | Model                 | Air quality             | Outdoor pollution-CH4, CO2 | 10.1016/j.atmosenv.2018.06.007     |



|     |                                                              |      |                                                                                                                     |            |                                                  |               |                                                   |                       |                     |                                                                        |                               |
|-----|--------------------------------------------------------------|------|---------------------------------------------------------------------------------------------------------------------|------------|--------------------------------------------------|---------------|---------------------------------------------------|-----------------------|---------------------|------------------------------------------------------------------------|-------------------------------|
|     |                                                              |      |                                                                                                                     |            |                                                  |               | Guangzhou, China                                  |                       |                     |                                                                        |                               |
| 357 | Ilmas, B., Mir, K. A., Khalid, S.                            | 2018 | Greenhouse gas emissions from the waste sector: a case study of Rawalpindi in Pakistan                              | Mitigation | Recommendations                                  | Local         | Rawalpindi, Pakistan                              | IPCC methodology      | Air quality         | Outdoor pollution-CH <sub>4</sub> , CO <sub>2</sub> , N <sub>2</sub> O | 10.1080/17583004.2018.1530025 |
| 360 | Kosir, M., Potocnik, J., Pajek, L.                           | 2018 | Impact of RCP4.5 climate change scenario on the bioclimatic potential of six selected European locations            | Mitigation | Recommendations                                  | International | Paris, Berlin, Ljubljana, Moscow, Rome and Madrid | Scenarios/projections | Socio-economic      | Bioclimatic potential                                                  | 10.2495/SDP-V13-N8-1090-1102  |
| 361 | Lam, Y. F.                                                   | 2018 | Climate Change and Air Quality in Southeastern China: Hong Kong Study                                               | Mitigation | Recommendations                                  | Local         | Hong Kong, China                                  | IPCC methodology      | Air quality         | Pollution-SO <sub>2</sub> , NO <sub>x</sub> , VOCs, PM <sub>2.5</sub>  | 10.1007/978-3-319-61346-8_12  |
| 363 | Lee, T. C., Peng, S. K., Yeh, C. T., Tseng, C. Y.            | 2018 | Bottom-up approach for downscaling CO <sub>2</sub> emissions in Taiwan: robustness analysis and policy implications | Mitigation | Recommendations                                  | National      | Taiwan                                            | IPCC methodology      | Air quality         | Pollution-CO <sub>2</sub>                                              | 10.1080/09640568.2017.1329714 |
| 364 | Li, Z., Huang, G., Huang, W., Lin, Q., Liao, R., Fan, Y.     | 2018 | Future changes of temperature and heat waves in Ontario, Canada                                                     | Mitigation | Recommendations                                  | Local         | Ontario, Canada                                   | Scenarios/projections | Extreme temperature | Heat                                                                   | 10.1007/s00704-017-2123-8     |
| 365 | Mahmoud, D., Gamal, G., Abou El Seoud, T.                    | 2018 | The potential impact of climate change on Hurghada city, Egypt, using tourism climate index                         | Adaptation | Recommendations                                  | Local         | Hurghada, Egypt                                   | Scenarios/projections | Socio-economic      | Tourism                                                                | 10.30892/gtg.25218-376        |
| 366 | Marchi, M., Niccolucci, V., Pulselli, R. M., Marchettini, N. | 2018 | Environmental policies for GHG emissions reduction and energy transition in the medieval historic centre of Siena   | Mitigation | Specific evidence (photovoltaic panels on roofs) | Local         | Siena, Italy                                      | IPCC methodology      | Socio-economic      | GHG emissions reductions and energy transition                         | 10.1016/j.jclepro.2018.03.068 |

|     |                                                                                                        |      |                                                                                                                            |            |                 |               |                                                                |                       |                     |                          |                                   |
|-----|--------------------------------------------------------------------------------------------------------|------|----------------------------------------------------------------------------------------------------------------------------|------------|-----------------|---------------|----------------------------------------------------------------|-----------------------|---------------------|--------------------------|-----------------------------------|
|     |                                                                                                        |      | (Italy): the role of solar energy                                                                                          |            |                 |               |                                                                |                       |                     |                          |                                   |
| 367 | Minuzzi, R. B., José, M. F.                                                                            | 2018 | Climatic aptitude for growing soybean-corn succession in future scenarios in Santa Catarina, Brazil                        | Adaptation | Recommendations | Local         | Santa Catarina, Brazil                                         | Scenarios/projections | Socio-economic      | Food security            | 10.15809/irriga.2018v23n4p773-783 |
| 369 | Murray, P., Orehounig, K., Grosspietsch, D., Carmeliet, J.                                             | 2018 | A comparison of storage systems in neighbourhood decentralized energy system applications from 2015 to 2050                | Mitigation | Recommendations | Local         | Altstetten, Switzerland                                        | Model                 | Socio-economic      | Storage systems          | 10.1016/j.apenergy.2018.08.106    |
| 370 | Navarro-Estupiñan, J., Robles-Morua, A., Vivoni, E. R., Zepeda, J. E., Montoya, J. A., Verduzco, V. S. | 2018 | Observed trends and future projections of extreme heat events in Sonora, Mexico                                            | Adaptation | Recommendations | Local         | Sonora, Mexico                                                 | Model                 | Extreme temperature | Heat                     | 10.1002/joc.5719                  |
| 371 | Peng, E. K., Malek, M. A., Azimah Bahrum, N., Tan, C. S.                                               | 2018 | Greenhouse Gas (GHG) emission estimation from cropland remaining cropland in AFOLU sector for various districts in Sarawak | Mitigation | Recommendations | Local         | Sarawak, Malaysia                                              | Scenarios/projections | Air quality         | Pollution                | 10.14419/ijet.v7i4.35.22327       |
| 372 | Puri, S., Perera, A. T. D., Mauree, D., Cocco, S., Delannoy, L., Scartezzini, J.-L.                    | 2018 | The role of distributed energy systems in European energy transition                                                       |            | Recommendations | International | Stockholm, Copenhagen, Madrid, Rome, Brussels, Paris, Belgrade | Model                 | Socio-economic      | Energy demand and supply | 10.1016/j.egypro.2019.01.014      |
| 378 | Samson, E. A., Boykin, K. G., Kepner, W. G.                                                            | 2018 | Evaluating biodiversity metric response to forecasted land use                                                             | Adaptation | Recommendations | Local         | Rio Grande, Brazil                                             | Scenarios/projections | Socio-economic      | Land use change          | 10.3390/envir.2018.091            |

|     |                                                                       |      |                                                                                                                                     |                                |                 |          |                        |                        |                         |                                               |                             |
|-----|-----------------------------------------------------------------------|------|-------------------------------------------------------------------------------------------------------------------------------------|--------------------------------|-----------------|----------|------------------------|------------------------|-------------------------|-----------------------------------------------|-----------------------------|
|     | Andersen, M. C., Fernald, A.                                          |      | change in the Northern Rio Grande Basin                                                                                             |                                |                 |          |                        |                        |                         |                                               |                             |
| 379 | Samu, R., Kentel, A. S.                                               | 2018 | An analysis of the flood management and mitigation measures in Zimbabwe for a sustainable future                                    | Mitigation                     | Recommendations | National | Zimbabwe               | Model                  | Sea level rise/flooding | Flooding                                      | 10.1016/j.ijdr.2018.07.013  |
| 380 | Sandholz, S., Lange, W., Nehren, U.                                   | 2018 | Governing green change: Ecosystem-based measures for reducing landslide risk in Rio de Janeiro                                      | Mitigation                     | Recommendations | Local    | Rio de Janeiro, Brazil | Descriptive statistics | Socio-economic          | Landslide risk                                | 10.1016/j.ijdr.2018.01.020  |
| 381 | Seguido, Á. F. M., Cantos, J. O., Amorós, A. M. R.                    | 2018 | A questioned transfer: The Tagus-Segura. Socio-economic repercussions in Spanish southeast and uncertainty regarding climate change | Adaptation                     | Recommendations | National | Spain                  | Scenarios/projections  | Socio-economic          | Hydraulic infrastructure                      | *NR                         |
| 384 | Sethi, M., Puppim de Oliveira, J. A.                                  | 2018 | Cities and climate co-benefits                                                                                                      | Both adaptation and mitigation | Recommendations | National | India                  | *NR                    | Socio-economic          | Urban Agenda (cities and climate co-benefits) | 10.1007/978-981-10-5816-5_1 |
| 387 | Tayarani, M., Poorfakhraei, A., Nadafianshamabadi, R., Rowangould, G. | 2018 | Can regional transportation and land-use planning achieve deep reductions in GHG emissions from vehicles?                           | Mitigation                     | Recommendations | Local    | Albuquerque, U.S.A     | Model                  | Socio-economic          | Transportation                                | 10.1016/j.trd.2018.05.010   |
| 389 | Toledo, A. L. L., Rovere, E. L. L.                                    | 2018 | Urban mobility and greenhouse gas emissions: Status, public policies, and scenarios in a developing economy city, Natal, Brazil     | Mitigation                     | Recommendations | Local    | Natal, Brazil          | IPCC methodology       | Socio-economic          | Urban mobility sector                         | 10.3390/su10113995          |

|     |                                                                                   |      |                                                                                                                                                               |            |                 |               |                                                                                                                                                                                                                  |                        |                         |                                      |                                |
|-----|-----------------------------------------------------------------------------------|------|---------------------------------------------------------------------------------------------------------------------------------------------------------------|------------|-----------------|---------------|------------------------------------------------------------------------------------------------------------------------------------------------------------------------------------------------------------------|------------------------|-------------------------|--------------------------------------|--------------------------------|
| 392 | Wiktorowicz, J., Babaeff, T., Breadsell, J., Byrne, J., Eggleston, J., Newman, P. | 2018 | WGV: An Australian Urban Precinct Case Study to Demonstrate the 1.5 degrees C Agenda Including Multiple SDGs                                                  | Mitigation | Recommendations | Local         | Perth, Australia                                                                                                                                                                                                 | *NR                    | Socio-economic          | Urban planning                       | 10.17645/up.v3i2.1245          |
| 394 | Yu, Q., Lau, A. K. H., Tsang, K. T., Fung, J. C. H.                               | 2018 | Human damage assessments of coastal flooding for Hong Kong and the Pearl River Delta due to climate change-related sea level rise in the twenty-first century | Adaptation | Recommendations | Local         | Hong Kong, China                                                                                                                                                                                                 | Descriptive statistics | Sea level rise/flooding | Flooding                             | 10.1007/s11069-018-3236-9      |
| 397 | Zhou, Y., Shan, Y., Liu, G., Guan, D.                                             | 2018 | Emissions and low-carbon development in Guangdong-Hong Kong-Macao Greater Bay Area cities and their surrounding                                               | Mitigation | Recommendations | International | Guangzhou, Shenzhen, Foshan, Dongguan, Zhuhai, Zhongshan, Jiangmen, Zhaoqing, Huizhou, Hong Kong, Macao, Shantou, Chaozhou, Jieyang, Shanwei, Zhanjiang, Maoming, Yangjiang, Shaoguan, Qingyuan, Yunfu, Meizhou, | IPCC methodology       | Socio-economic          | Emissions and low carbon development | 10.1016/j.apenergy.2018.07.038 |

|     |                                                                                   |      |                                                                                                                                           |            |                 |          |                      |                             |                         |                             |                                |
|-----|-----------------------------------------------------------------------------------|------|-------------------------------------------------------------------------------------------------------------------------------------------|------------|-----------------|----------|----------------------|-----------------------------|-------------------------|-----------------------------|--------------------------------|
|     |                                                                                   |      |                                                                                                                                           |            |                 |          | Heyuan,<br>China     |                             |                         |                             |                                |
| 398 | Zhuang, G., Zhou, Z. g.                                                           | 2018 | Formulation of Low-Carbon City Development Roadmap: Technical Elements and Recommendations                                                | Mitigation | Recommendations | National | China                | Scenarios/projections       | Socio-economic          | Low carbon city development | 10.1142/s2345748117500233      |
| 399 | Aldersoni, A. A., Chow, D. H. C.                                                  | 2018 | Adapting Traditional Passive Strategies within Contemporary House to Decrease High energy consumption Impact in Nejd Region, Saudi Arabia | Mitigation | Recommendations | Local    | Riyadh, Saudi Arabia | Model                       | Socio-economic          | Energy consumption          | 10.1088/1755-1315/329/1/012007 |
| 401 | Andimuthu, R., Kandasamy, P., Mudgal, B. V., Jeganathan, A., Balu, A., Sankar, G. | 2019 | Performance of urban storm drainage network under changing climate scenarios: Flood mitigation in Indian coastal city                     | Mitigation | Recommendations | Local    | Chenna, India        | Scenarios/projections       | Sea level rise/flooding | Flooding                    | 10.1038/s41598-019-43859-3     |
| 405 | Balasubramanian, T. N., Nambi Appadurai, A.                                       | 2019 | Climate policy                                                                                                                            | Mitigation | Recommendations | Global   |                      | *NR                         | Socio-economic          | Climate policy              | 10.1007/978-981-13-9570-3_2    |
| 406 | Baycan, N., Zengin, T. O., Iop                                                    | 2019 | Determination of Carbon Footprint of Automobile Origin in Izmir City                                                                      | Mitigation | Recommendations | Local    | Izmir, Turkey        | IPCC methodology            | Air quality             | Pollution-carbon footprint  | 10.1088/1755-1315/642/1/012015 |
| 409 | Carrillo, J., Garijo, D., Crowley, M., Carrillo, R., Gil, Y., Borda, K.           | 2019 | Semantic workflows and machine learning for the assessment of carbon storage by urban trees                                               | Mitigation | Recommendations | Local    | Juba, South Sudan    | Machine learning/algorithms | Socio-economic          | Urban trees                 | *NR                            |
| 410 | Chen, Y., Li, M., Su, K., Li, X.                                                  | 2019 | Spatial-Temporal Characteristics of the Driving Factors of Agricultural Carbon                                                            | Mitigation | Recommendations | Local    | Fujian, China        | Model                       | Air quality             | Pollution                   | 10.3390/en12163102             |

|     |                                                                                                 |      |                                                                                                                                   |                                |                 |               |                                                                                             |       |                |                                                |                                 |
|-----|-------------------------------------------------------------------------------------------------|------|-----------------------------------------------------------------------------------------------------------------------------------|--------------------------------|-----------------|---------------|---------------------------------------------------------------------------------------------|-------|----------------|------------------------------------------------|---------------------------------|
|     |                                                                                                 |      | Emissions: Empirical Evidence from Fujian, China                                                                                  |                                |                 |               |                                                                                             |       |                |                                                |                                 |
| 411 | Clerici, N., Cote-Navarro, F., Escobedo, F. J., Rubiano, K., Villegas, J. C.                    | 2019 | Spatio-temporal and cumulative effects of land use-land cover and climate change on two ecosystem services in the Colombian Andes | Mitigation                     | Recommendations | Local         | Bogota, Columbia                                                                            | Model | Socio-economic | Land use /land cover change and climate change | 10.1016/j.scitotenv.2019.06.275 |
| 412 | de la Torre Bayo, J. J., Díaz-López, C., Rodríguez González, M. L., Ibarra, E. M., Zamorano, M. | 2019 | Climate classification and its applicability to buildings                                                                         | Adaptation                     | Recommendations | National      | Spain                                                                                       | Model | Socio-economic | Buildings                                      | 10.2495/SC190281                |
| 413 | Delannoy, L., Puri, S., Perera, A. T. D., Coccolo, S., Mauree, D., Scartezzini, J. L.           | 2019 | Climate impact and energy sustainability of future European neighborhoods                                                         | Mitigation                     | Recommendations | International | Hemmerg, Copenhagen, Stockholm, Berlin, Budapest, Athens, London, Nicosia, Amsterdam, Paris | Model | Socio-economic | Energy demand and supply                       | 10.1109/EFEA.2018.8617066       |
| 414 | Dew, R. M., Silva, D. P., Rehan, S. M.                                                          | 2019 | Range expansion of an already widespread bee under climate change                                                                 | Mitigation                     | Recommendations | Without scale |                                                                                             | Model | Socio-economic | Bee species                                    | 10.1016/j.gecco.2019.e00584     |
| 417 | Frantzeskaki, N., McPhearson, T., Collier, M. J., Kendal, D., Bulkeley, H., Dumitru, A., Walsh, | 2019 | Nature-based solutions for urban climate change adaptation: Linking science, policy, and practice communities for                 | Both adaptation and mitigation | Recommendations | Local         | Edmonton, Canada                                                                            | *NR   | Socio-economic | Nature Based Solutions (Urban Agenda)          | 10.1093/biosci/biz042           |

|     |                                                              |      |                                                                                                                                                  |            |                 |          |                                                                                                                                                                                                                           |                        |                |                                          |                               |
|-----|--------------------------------------------------------------|------|--------------------------------------------------------------------------------------------------------------------------------------------------|------------|-----------------|----------|---------------------------------------------------------------------------------------------------------------------------------------------------------------------------------------------------------------------------|------------------------|----------------|------------------------------------------|-------------------------------|
|     | C., Noble, K., Van Wyk, E., Ordóñez, C., Oke, C., Pinter, L. |      | evidence-based decision-making                                                                                                                   |            |                 |          |                                                                                                                                                                                                                           |                        |                |                                          |                               |
| 418 | Göpfert, C., Wamsler, C., Lang, W.                           | 2019 | Institutionalizing climate change mitigation and adaptation through city advisory committees: Lessons learned and policy futures                 | Mitigation | Recommendations | National | Aschaffenburg, Bonn, Darmstadt, Dortmund, Frankfurt am Main, Göttingen, Hannover, Heidelberg, Kaiserslautern, Karlsruhe, Kempten, Ludwigshafen, Magdeburg, Mainz, Muenster, Mülheim, Osnabrueck, Potsdam, Würzburg, China | Descriptive statistics | Socio-economic | Climate change mitigation and adaptation | 10.1016/j.cacint.2019.100004  |
| 420 | Hadadi, O. A., Lee, S.                                       | 2019 | The climate change mitigation potential of Algiers URT through mode shift from the car to rail—assessing CO <sub>2</sub> emissions reductions on | Mitigation | Recommendations | Local    | Algiers, Algeria                                                                                                                                                                                                          | IPCC methodology       | Air quality    | Outdoor pollution-CO <sub>2</sub>        | 10.1080/13563475.2018.1535960 |

|     |                                                            |      |                                                                                                                                                             |            |                 |               |                       |                       |                |                               |                                |
|-----|------------------------------------------------------------|------|-------------------------------------------------------------------------------------------------------------------------------------------------------------|------------|-----------------|---------------|-----------------------|-----------------------|----------------|-------------------------------|--------------------------------|
|     |                                                            |      | the basis of savings in fuel consumption                                                                                                                    |            |                 |               |                       |                       |                |                               |                                |
| 421 | Han, D., Qiao, R., Ma, X.                                  | 2019 | Optimization of Land-Use Structure Based on the Trade-Off Between Carbon Emission Targets and Economic Development in Shenzhen, China                       | Mitigation | Recommendations | Local         | Shenzhen, China       | IPCC methodology      | Socio-economic | Economic development          | 10.3390/su11010011             |
| 422 | Huang, P. J., Huang, S. L., Marcotullio, P. J.             | 2019 | Relationships between CO2 emissions and embodied energy in building construction: A historical analysis of Taipei                                           | Mitigation | Recommendations | Local         | Taipei, Taiwan        | IPCC methodology      | Air quality    | Pollution- CO2                | 10.1016/j.buildenv.2019.03.059 |
| 424 | Jia, J., Gong, Z., Chen, C., Gu, Z., Xie, D.               | 2019 | Incorporating carbon emissions from landfills and wastewater treatment into a household emission inventory for systematically analysing household behaviour | Mitigation | Recommendations | Local         | Nanchang, China,      | IPCC methodology      | Air quality    | Pollution-CO2                 | 10.2166/wcc.2018.071           |
| 425 | Jusselme, T., Fernandes, P. A., Rey, E., Andersen, M.      | 2019 | Design guidance from a data-driven LCA-based design method and tool prototype                                                                               | Mitigation | Recommendations | Local         | Fribourg, Switzerland | Life cycle assessment | Socio-economic | Design guidance for buildings | *NR                            |
| 426 | Khan, M. D., Shakya, S., Vu, H. H. T., Ahn, J. W., Nam, G. | 2019 | Water environment policy and climate change: A comparative study of India and South Korea                                                                   | Mitigation | Recommendations | International | India, South Korea    | *NR                   | Socio-economic | Water environment policy      | 10.3390/SU11123284             |
| 427 | Kim, M. K., Choi, J. H.                                    | 2019 | Can increased outdoor CO2 concentrations impact on the ventilation                                                                                          | Adaptation | Recommendations | Local         | Shanghai, China       | Model                 | Air quality    | Indoor pollution-CO2          | 10.1016/j.atmosenv.2019.04.015 |



|     |                                                                                        |      |                                                                                                                                                                                                                                                                    |            |                                                                                |       |                             |                           |                                |                                 |                                            |
|-----|----------------------------------------------------------------------------------------|------|--------------------------------------------------------------------------------------------------------------------------------------------------------------------------------------------------------------------------------------------------------------------|------------|--------------------------------------------------------------------------------|-------|-----------------------------|---------------------------|--------------------------------|---------------------------------|--------------------------------------------|
|     |                                                                                        |      | and energy in buildings?<br>A case study in Shanghai,<br>China                                                                                                                                                                                                     |            |                                                                                |       |                             |                           |                                |                                 |                                            |
| 428 | Kontogianni, A.,<br>Damigos, D.,<br>Kyrtzoglou, T.,<br>Tourkolias, C.,<br>Skourtos, M. | 2019 | Development of a<br>composite climate change<br>vulnerability index for<br>small craft harbours                                                                                                                                                                    | Adaptation | Recomm<br>endation<br>s                                                        | Local | Lesvos<br>Island,<br>Greece | IPCC<br>methodolog<br>y   | Socio-<br>economic             | Small craft<br>harbours         | 10.1080/1747<br>7891.2018.15<br>12469      |
| 429 | Lahmouri, M.,<br>Drewes, J. E.,<br>Gondhalekar, D.                                     | 2019 | Analysis of greenhouse<br>gas emissions in<br>centralized and<br>decentralized water<br>reclamation with<br>resource recovery<br>strategies in Leh Town,<br>Ladakh, India, and<br>potential for their<br>reduction in context of<br>the Water-Energy-Food<br>Nexus | Mitigation | Recomm<br>endation<br>s                                                        | Local | Leh, India                  | Scenarios/pr<br>ojections | Air quality                    | Pollution- CO2,<br>CH4, and N2O | 10.3390/w11<br>050906                      |
| 430 | Lam, Y. F., Mul<br>Roy, S.                                                             | 2019 | Climate adaptation of<br>sea-level rise in Hong<br>Kong                                                                                                                                                                                                            | Adaptation | Recomm<br>endation<br>s                                                        | Local | Hong<br>Kong,<br>China      | Scenarios/pr<br>ojections | Sea level<br>rise/floodi<br>ng | Sea level rise                  | 10.1007/978-<br>3-030-23773-<br>8_9        |
| 431 | Lassandro, P., Di<br>Turi, S., Zaccaro, S.<br>A.                                       | 2019 | Mitigation of rising<br>urban temperatures<br>starting from historic and<br>modern street canyons<br>towards zero energy<br>settlement                                                                                                                             | Mitigation | Specific<br>evidence<br>(Vegetati<br>on, green<br>roofs and<br>water<br>jects) | Local | Bari, Italy                 | Model                     | Extreme<br>temperatur<br>e     | Heat                            | 10.1088/1757<br>-<br>899X/609/7/0<br>72036 |
| 432 | Lee, S.                                                                                | 2019 | An assessment of CO2<br>emission and absorption<br>in response to land-cover<br>changes in the Seoul<br>metropolitan area                                                                                                                                          | Mitigation | Recomm<br>endation<br>s                                                        | Local | Seoul,<br>South<br>Korea    | Model                     | Air quality                    | Pollution-CO2                   | 10.18178/ijes<br>d.2019.10.12.<br>1208     |

|     |                                                                                                           |      |                                                                                                                                          |            |                 |          |                 |                             |                         |                          |                           |
|-----|-----------------------------------------------------------------------------------------------------------|------|------------------------------------------------------------------------------------------------------------------------------------------|------------|-----------------|----------|-----------------|-----------------------------|-------------------------|--------------------------|---------------------------|
| 433 | Li, Z., Li, Y., Shao, ., S.                                                                               | 2019 | Analysis of Influencing Factors and Trend Forecast of Carbon Emission from Energy Consumption in China Based on Expanded STIRPAT Model   | Mitigation | Recommendations | National | China           | IPCC methodology            | Socio-economic          | Energy consumption       | 10.3390/en12163054        |
| 436 | Mammarella, M. C., Grandoni, G.                                                                           | 2019 | Resilience actions to counteract the effects of climate change and health emergencies in cities: The role of artificial neural networks  | Adaptation | Recommendations | Local    | Arizona, USA    | Machine learning/algorithms | Health                  | Health                   | 10.4415/ANN_19_04_14      |
| 437 | Martínez-Gomariz, E., Locatelli, L., Guerrero, M., Russo, B., Martínez, M.                                | 2019 | Socio-economic potential impacts due to urban pluvial floods in Badalona (Spain) in a context of climate change                          | Adaptation | Recommendations | Local    | Badalona, Spain | Scenarios/projections       | Sea level rise/Flooding | Flooding                 | 10.3390/W11122658         |
| 438 | Meyer, I., Hama, M., Jandl, R., Leitner, M., Keuschnig, M., Anders, I., Fritz, O., Berthold, H., Eder, B. | 2019 | Co-creating a desirable and resilient future for Lienz, Austria-a local case study in socio-economic scenario development                | Mitigation | Recommendations | Local    | Lienz, Austria  | Survey and participatory    | Socio-economic          | Economic development     | 10.1007/s10113-018-1439-y |
| 439 | Misra, P., Imasu, R., Takeuchi, W.                                                                        | 2019 | Impact of urban growth on air quality in Indian cities using hierarchical Bayesian approach                                              | Mitigation | Recommendations | National | India           | Descriptive statistics      | Air quality             | Pollution-PM2.5          | 10.3390/atmos10090517     |
| 440 | Murtagh, N., Odeleye, N. D., Maidment, C.                                                                 | 2019 | Identities as enabling conditions of sustainability practices in urban planning: A critical realist exploration with planners in England | Mitigation | Recommendations | National | England, UK     | Survey and participatory    | Socio-economic          | Sustainability practices | 10.17645/up.v4i4.2263     |

|     |                                                                                    |      |                                                                                                                                                           |                                |                 |               |                                                                    |                       |                         |                                              |                               |
|-----|------------------------------------------------------------------------------------|------|-----------------------------------------------------------------------------------------------------------------------------------------------------------|--------------------------------|-----------------|---------------|--------------------------------------------------------------------|-----------------------|-------------------------|----------------------------------------------|-------------------------------|
| 441 | Navarro Gonzalez, I., Jimenez Cisneros, B., Aponte Hernandez, N., Montes Rojas, R. | 2019 | Adaptation and mitigation synergies to improve sanitation: a case study in Morelos, Mexico                                                                | Both adaptation and mitigation | Recommendations | Local         | Morelos State, Mexico                                              | IPCC methodology      | Air quality             | Pollution-CH <sub>4</sub> , N <sub>2</sub> O | 10.2166/wcc.2018.121          |
| 443 | Nematchoua, M. K., Yvon, A., Kalameu, O., Asadi, S., Choudhary, R., Reiter, S.     | 2019 | Impact of climate change on demands for heating and cooling energy in hospitals: An in-depth case study of six islands located in the Indian Ocean region | Mitigation                     | Recommendations | International | Antananarivo, Victoria, Moroni, Mamoudzou, Port-Louis, Saint-Denis | Model                 | Socio-economic          | Energy demand                                | 10.1016/j.scs.2018.10.031     |
| 445 | Paul, A., Deka, J., Gujre, N., Rangan, L., Mitra, S.                               | 2019 | Does nature of livelihood regulate the urban community's vulnerability to climate change? Guwahati city, a case study from North East India               | Adaptation                     | Recommendations | Local         | Guwahati, India                                                    | IPCC methodology      | Socio-economic          | Vulnerability                                | 10.1016/j.jenvman.2019.109591 |
| 446 | Pulselli, R. M., Marchi, M., Neri, E., Marchettini, N., Bastianoni, S.             | 2019 | Carbon accounting framework for decarbonisation of European city neighbourhoods                                                                           | Mitigation                     | Recommendations | International | European cities                                                    | IPCC methodology      | Socio-economic          | Decarbonization                              | 10.1016/j.jclepro.2018.10.102 |
| 447 | Qu, S., Guan, D., Ma, Z., Yi, X.                                                   | 2019 | A study on the optimal path of methane emissions reductions in a municipal solid waste landfill treatment based on the IPCC-SD model                      | Mitigation                     | Recommendations | National      | Chinese cities                                                     | Model                 | Air quality             | Outdoor pollution-CH <sub>4</sub>            | 10.1016/j.jclepro.2019.03.059 |
| 448 | Rohmer, J., Le Cozannet, G., Manceau, J. C.                                        | 2019 | Addressing ambiguity in probabilistic assessments of future coastal flooding                                                                              | Adaptation                     | Recommendations | National      | France                                                             | Scenarios/projections | Sea level rise/flooding | Flooding                                     | 10.1007/s10584-019-02443-4    |

|     |                                                                    |      |                                                                                                                 |            |                 |               |                                                                                                     |                          |                      |                                              |                               |
|-----|--------------------------------------------------------------------|------|-----------------------------------------------------------------------------------------------------------------|------------|-----------------|---------------|-----------------------------------------------------------------------------------------------------|--------------------------|----------------------|----------------------------------------------|-------------------------------|
|     |                                                                    |      | using possibility distributions                                                                                 |            |                 |               |                                                                                                     |                          |                      |                                              |                               |
| 450 | Roshan, G., Oji, R., Attia, S.                                     | 2019 | Projecting the impact of climate change on design recommendations for residential buildings in Iran             | Adaptation | Recommendations | National      | Bandarabbas Bushehr Mashhad Abadan Esfahan Ramsar Ghazvin Ardabeil Hamedan-Nozeh Firuzkuh-GAW, Iran | IPCC methodology         | Socio-economic       | Building design recommendations              | 10.1016/j.builenv.2019.03.053 |
| 451 | Serafín González, S. L.                                            | 2019 | Externalidades de las emisiones del transporte público en Tepic, México: cambio climático y sustentabilidad     | Mitigation | Recommendations | Local         | Tepic, Mexico                                                                                       | IPCC methodology         | Air quality          | Pollution-CO2                                | 10.14483/22487638.15455       |
| 452 | Sharma, N., Kumar, P. P., Dhyani, R., Ravisekhar, C., Ravinder, K. | 2019 | Idling fuel consumption and emissions of air pollutants at selected signalized intersections in Delhi           | Mitigation | Recommendations | Local         | Delhi, India                                                                                        | Survey and participatory | Air quality          | Pollution- CO2, CH4, and N2O, CO, NOx, NMVOC | 10.1016/j.jclepro.2018.11.275 |
| 454 | Singh, M., Leena, G.                                               | 2019 | Forecasting of GHG emission and linear pinch analysis of municipal solid waste for the city of Faridabad, India | Mitigation | Recommendations | Local         | Faridabad, India                                                                                    | IPCC methodology         | Socio-economic       | Solid waste disposal                         | 10.1080/15567036.2019.1568642 |
| 455 | Singh, R. P., Kolok, A. S., Bartelt-Hunt, S. L.                    | 2019 | Water Conservation, Recycling and Reuse: Issues and Challenge                                                   | Adaptation | Recommendations | Without scale |                                                                                                     | *NR                      | Water supply/drought | Water supply                                 | 10.1007/978-981-13-3179-4     |

|     |                                                                                                                             |      |                                                                                                                                    |            |                 |          |                                                                                                                                                                        |                       |                |                                                                                                     |                                |
|-----|-----------------------------------------------------------------------------------------------------------------------------|------|------------------------------------------------------------------------------------------------------------------------------------|------------|-----------------|----------|------------------------------------------------------------------------------------------------------------------------------------------------------------------------|-----------------------|----------------|-----------------------------------------------------------------------------------------------------|--------------------------------|
| 456 | Sthel, M. S., Mothé, G. A., Lima, M. A., de Castro, M. P. P., Esquef, I., da Silva, M. G.                                   | 2019 | Pollutant gas and particulate material emissions in ethanol production in Brazil: social and environmental impacts                 | Mitigation | Recommendations | Local    | Campos dos Goytacazes, Brazil                                                                                                                                          | Experiment/laboratory | Air quality    | Outdoor pollution-N <sub>2</sub> O, CO, NO <sub>x</sub> (NO, NO <sub>2</sub> ), and SO <sub>2</sub> | 10.1007/s11356-019-06613-w     |
| 457 | Suryati, I., Manik, B. D. L., Syavira, F., Karina, G. N., Herlina, N., Hasibuan, N. H., Siregar, R. L., I. O. P. Publishing | 2019 | Alternative study of reducing Carbon Dioxide (CO <sub>2</sub> ) from the transportation sector in Medan city                       | Mitigation | Recommendations | Local    | Medan, Indonesia                                                                                                                                                       | IPCC methodology      | Air quality    | Outdoor pollution-CO <sub>2</sub>                                                                   | 10.1088/1757-899x/801/1/012072 |
| 459 | Toy, S., Demircan, N.                                                                                                       | 2019 | Possible ways of mitigating the effects of climate change using efficient urban planning and landscape design principles in Turkey | Mitigation | Recommendations | National | Turkey                                                                                                                                                                 | IPCC methodology      | Socio-economic | Urban planning and landscape design                                                                 | *NR                            |
| 460 | Wang, J., Chen, L., Chen, L., Zhao, X., Wang, M., Ju, Y., Xin, L.                                                           | 2019 | City-level features of energy footprints and carbon dioxide emissions in Sichuan province of China                                 | Mitigation | Recommendations | National | Chengdu<br>Mianyang<br>Panzhihua<br>Deyang<br>Guangyuan<br>Yibin<br>Luzhou<br>Zigong<br>Leshan<br>Suining<br>Ganzi<br>Meishan<br>Neijiang<br>Yaan<br>Ziyang<br>Sichuan | IPCC methodology      | Socio-economic | Low carbon development                                                                              | 10.3390/en12102025             |

|     |                                                                                                  |      |                                                                                                                                                |            |                 |               | Province,<br>China |                          |                      |                                |                                |
|-----|--------------------------------------------------------------------------------------------------|------|------------------------------------------------------------------------------------------------------------------------------------------------|------------|-----------------|---------------|--------------------|--------------------------|----------------------|--------------------------------|--------------------------------|
| 461 | Wang, L., Pei, J., Geng, J., Niu, Z.                                                             | 2019 | Tracking the spatial-temporal evolution of carbon emissions in China from 1999 to 2015: A land use perspective                                 | Mitigation | Recommendations | National      | China              | IPCC methodology         | Socio-economic       | Carbon emission of land use    | 10.3390/su11174531             |
| 462 | Xu, C., Haase, D., Su, M., Yang, Z.                                                              | 2019 | The impact of urban compactness on energy-related greenhouse gas emissions across EU member states: Population density vs physical compactness | Mitigation | Recommendations | International | EU member states   | IPCC methodology         | Socio-economic       | Urban compactness              | 10.1016/j.apenergy.2019.113671 |
| 465 | Zhang, M., Liu, Z., Van Dijk, M. P.                                                              | 2019 | Measuring urban vulnerability to climate change using an integrated approach, assessing climate risks in Beijing                               | Adaptation | Recommendations | Local         | Beijing, China     | Survey and participatory | Socio-economic       | Urban vulnerability            | 10.7717/peerj.7018             |
| 466 | Zhao, C. S., Yang, Y., Yang, S. T., Xiang, H., Zhang, Y., Wang, Z. Y., Chen, X., Mitrovic, S. M. | 2019 | Predicting future river health in a minimally influenced mountainous area under climate change                                                 | Adaptation | Recommendations | Local         | Jinan, China       | IPCC methodology         | Water supply/drought | Water quality (river health)   | 10.1016/j.scitotenv.2018.11430 |
| 467 | Zhao, R., Huang, Y., Yao, M. X., Zhan, L. P., Peng, D. P.                                        | 2019 | Carbon emission assessment of an urban community                                                                                               | Mitigation | Recommendations | Local         | Ya'an, China       | IPCC methodology         | Socio-economic       | Carbon emission assessment     | 10.15666/aer/1706_1367313684   |
| 468 | Zhu, E., Deng, J., Zhou, M., Gan, M., Jiang, R., Wang, K., Shahtahmassebi, A.                    | 2019 | Carbon emissions induced by land-use and land-cover change from 1970 to 2010 in Zhejiang, China                                                | Mitigation | Recommendations | Local         | Zhejiang, China    | GIS/remote sensing       | Socio-economic       | Land use and land cover change | 10.1016/j.scitotenv.2018.07317 |

|     |                                                                                   |      |                                                                                                                                                     |                                |                 |               |                                                                                                                                                                                               |                    |                         |                           |                                 |
|-----|-----------------------------------------------------------------------------------|------|-----------------------------------------------------------------------------------------------------------------------------------------------------|--------------------------------|-----------------|---------------|-----------------------------------------------------------------------------------------------------------------------------------------------------------------------------------------------|--------------------|-------------------------|---------------------------|---------------------------------|
| 469 | Abadie, L. M., Jackson, L. P., de Murieta, E. S., Jevrejeva, S., Galarraga, I.    | 2020 | Comparing urban coastal flood risk in 136 cities under two alternative sea-level projections: RCP 8.5 and an expert opinion-based high-end scenario | Adaptation                     | Recommendations | International | 136 coastal megacities (Guangzhou, Guangdong, Mumbai, New Orleans, Guayaquil, Alexandria, Shenzhen, Calcutta, Bangkok, Osaka-Kobe, Tokyo, Shanghai, Tianjin, Hai Phong, Nagoya, Abidjan, etc. | Model              | Sea level rise/flooding | Flooding                  | 10.1016/j.oceanaman.2020.105249 |
| 470 | Afriyane, D., Julian, M. M., Riqqi, A., Akbar, R., Suroso, D. S. A., Kustiwan, I. | 2020 | Re-framing urban green spaces planning for flood protection through socio-ecological resilience in Bandung City, Indonesia                          | Both adaptation and mitigation | Recommendations | Local         | Bandung, Indonesia                                                                                                                                                                            | GIS/remote sensing | Sea level rise/flooding | Flood protection          | 10.1016/j.cities.2020.102710    |
| 471 | Almeida, J., Engel, C.                                                            | 2020 | Guidelines for Climate Change Adaptation in Brazilian Cities through Urban Green Infrastructure                                                     | Adaptation                     | Recommendations | National      | Brazilian cities                                                                                                                                                                              | IPCC methodology   | Socio-economic          | Climate change adaptation | 10.1088/1755-1315/503/1/012036  |
| 476 | Borbor-Cordova, M. J., Ger, G., Valdiviezo-Ajila, A.                              | 2020 | An operational framework for urban vulnerability to floods in                                                                                       | Adaptation                     | Recommendations | Local         | Duran, Ecuador                                                                                                                                                                                | Model              | Sea level rise/flooding | Flooding                  | 10.3390/su122410292             |

|     |                                                                                                                         |      |                                                                                                                                                                  |            |                 |          |                          |                  |                     |                            |                                  |
|-----|-------------------------------------------------------------------------------------------------------------------------|------|------------------------------------------------------------------------------------------------------------------------------------------------------------------|------------|-----------------|----------|--------------------------|------------------|---------------------|----------------------------|----------------------------------|
|     | A., Arias-Hidalgo, M., Matamoros, D., Nolivos, I., Menoscal-Aldas, G., Valle, F., Pezzoli, A., Cornejo-Rodriguez, M. P. |      | the guayas estuary region: The duran case study                                                                                                                  |            |                 |          |                          |                  |                     |                            |                                  |
| 477 | Bradecki, T., Konsek, P.                                                                                                | 2020 | Examples and concepts of floating architecture in the face of climate change - The example of Szczecin                                                           | Adaptation | Recommendations | Local    | Szczecin, Poland         | *NR              | Socio-economic      | Floating architecture      | 10.1088/1757 - 899X/960/3/032062 |
| 478 | Cárdenas-Jirón, L. A., Miranda, F.                                                                                      | 2020 | Variation in the Irradiance on Facades According to Solar Access at Neighbourhood Level in Winter, Santiago. A Rationale for Public Policy in the Urban Planning | Mitigation | Recommendations | Local    | Ñuñoa-Santiago, Chile    | Model            | Extreme temperature | Solar access               | 10.1088/1755 - 1315/503/1/012046 |
| 480 | de Morais, M. V. B., Guerrero, V. V. U., Rudke, A. P., Fujita, T., Martins, L. D., Martins, J. A.                       | 2020 | Evaluation of future climate change scenarios in urban heat island and its neighborhood using dynamical downscaling                                              | Mitigation | Recommendations | Local    | Londrina, Brazil         | Model            | Extreme temperature | Urban heat island          | 10.4090/juee. 2020.v14n1.101118  |
| 482 | Estoque, R. C., Ooba, M., Seposo, X. T., Togawa, T., Hijioka, Y., Takahashi, K., Nakamura, S.                           | 2020 | Heat health risk assessment in Philippine cities using remotely sensed data and social-ecological indicators                                                     | Adaptation | Recommendations | National | 139 cities in Philippine | IPCC methodology | Health              | Mortality                  | 10.1038/s41467-020-15218-8       |
| 483 | Fang, A., Chen, Y., Wu, L.                                                                                              | 2020 | Transient simulation of coupled heat and moisture transfer through multi-layer walls                                                                             | Adaptation | Recommendations | Local    | Guangzhou, China         | Model            | Extreme temperature | Heat and moisture transfer | 10.1016/j.scs. 2019.101812       |



|     |                                                                                |      |                                                                                                                                                                            |                                |                              |          |                       |                       |                |                                             |                                  |
|-----|--------------------------------------------------------------------------------|------|----------------------------------------------------------------------------------------------------------------------------------------------------------------------------|--------------------------------|------------------------------|----------|-----------------------|-----------------------|----------------|---------------------------------------------|----------------------------------|
|     |                                                                                |      | exposed to future climate in the hot and humid southern China area                                                                                                         |                                |                              |          |                       |                       |                |                                             |                                  |
| 484 | Ghafoor, G. Z., Sharif, F., Khan, A. U., Hayyat, M. U., Farhan; L. Shahzad, M. | 2020 | Energy consumption and carbon dioxide emissions of residential buildings in Lahore, Pakistan                                                                               | Mitigation                     | Recommendations              | Local    | Lahore, Pakistan      | IPCC methodology      | Socio-economic | Energy consumption in residential buildings | 10.15244/pjoes/109305            |
| 485 | Hawchar, L., Naughton, O., Nolan, P., Stewart, M. G., Ryan, P. C.              | 2020 | A GIS-based framework for high-level climate change risk assessment of critical infrastructure                                                                             | Adaptation                     | Recommendations              | National | Ireland               | GIS/remote sensing    | Socio-economic | Critical infrastructure vulnerability       | 10.1016/j.crm.2020.100235        |
| 490 | Huang, J., Tang, Z., Liu, D., He, J.                                           | 2020 | Ecological response to urban development in a changing socio-economic and climate context: Policy implications for balancing regional development and habitat conservation | Both adaptation and mitigation | Recommendations              | Local    | Hubei Province, China | Model                 | Socio-economic | Ecological response to urban development    | 10.1016/j.landusepol.2020.104772 |
| 492 | Jing, C., Tao, H., Jiang, T., Wang, Y., Zhai, J., Cao, L., Su, B.              | 2020 | Population, urbanization and economic scenarios over the Belt and Road region under the Shared Socioeconomic Pathways                                                      | Adaptation                     | Recommendations              | Global   |                       | Scenarios/projections | Socio-economic | Population and urbanization                 | 10.1007/s11442-020-1715-x        |
| 496 | Kousis, I., Fabiani, C., Ercolanoni, L., Pisello, A. L.                        | 2020 | Using bio-oils for improving environmental performance of an advanced resinous binder for pavement applications with heat and noise island mitigation potential            | Mitigation                     | Specific evidence (bio-oils) | Global   |                       | Experiment/laboratory | Socio-economic | Bio-oils                                    | 10.1016/j.seta.2020.100706       |

|     |                                                                                      |      |                                                                                                                                                                             |            |                 |               |                                  |                    |                         |                         |                                 |
|-----|--------------------------------------------------------------------------------------|------|-----------------------------------------------------------------------------------------------------------------------------------------------------------------------------|------------|-----------------|---------------|----------------------------------|--------------------|-------------------------|-------------------------|---------------------------------|
| 498 | Lin, W., Sun, Y., Nijhuis, S., Wang, Z.                                              | 2020 | Scenario-based flood risk assessment for urbanizing deltas using future land-use simulation (FLUS): Guangzhou Metropolitan Area as a case study                             | Mitigation | Recommendations | Local         | Guangzhou, China                 | GIS/remote sensing | Sea level rise/flooding | Flood risk assessment   | 10.1016/j.scitotenv.2020.139899 |
| 499 | Marelle, L., Myhre, G., Steensen, B. M., Hodnebrog, Ø., Alterskjær, K., Sillmann, J. | 2020 | Urbanization in megacities increases the frequency of extreme precipitation events far more than their intensity                                                            | Mitigation | Recommendations | International | Paris, Tokyo, Shanghai, New York | Model              | Socio-economic          | Urbanization            | 10.1088/1748-9326/abcc8f        |
| 500 | Merschroth, S., Miatto, A., Weyand, S., Tanikawa, H., Schebek, L.                    | 2020 | Lost material stock in buildings due to sea level rise from global warming: The case of Fiji Islands                                                                        | Adaptation | Recommendations | National      | Fiji                             | GIS/remote sensing | Sea level rise/flooding | Sea level rise          | 10.3390/su12030834              |
| 503 | Ougougdal, H. A., Khebiza, M. Y., Messouli, M., Lachir, A.                           | 2020 | Assessment of future water demand and supply under IPCC climate change and socio-economic scenarios, using a combination of models in Ourika watershed, High Atlas, Morocco | Adaptation | Recommendations | Local         | Ourika, Morocco                  | Model              | Water supply/drought    | Water demand and supply | 10.3390/w12061751               |
| 504 | Park, J., Yang, B.                                                                   | 2020 | GIS-enabled digital twin system for sustainable evaluation of carbon emissions: A case study of Jeonju city, south Korea                                                    | Adaptation | Recommendations | Local         | Jeonju, South Korea              | IPCC methodology   | Air quality             | Pollution               | 10.3390/su12219186              |
| 505 | Park, S., Kim, S. J., Yu, H., Lim, C. H.,                                            | 2020 | Developing an adaptive pathway to mitigate air pollution risk for                                                                                                           | Mitigation | Recommendations | National      | South Korea                      | IPCC methodology   | Air quality             | Pollution               | 10.3390/su12051790              |

|     |                                                                                                           |      |                                                                                                                                                                             |            |                 |          |                        |                        |                     |                                 |                                 |
|-----|-----------------------------------------------------------------------------------------------------------|------|-----------------------------------------------------------------------------------------------------------------------------------------------------------------------------|------------|-----------------|----------|------------------------|------------------------|---------------------|---------------------------------|---------------------------------|
|     | Park, E., Kim, J., Lee, W. K.                                                                             |      | vulnerable groups in South Korea                                                                                                                                            |            |                 |          |                        |                        |                     |                                 |                                 |
| 507 | Pioppi, B., Pigliautile, I., Piselli, C., Pisello, A. L.                                                  | 2020 | Cultural heritage microclimate change: Human-centric approach to experimentally investigate intra-urban overheating and numerically assess foreseen future scenarios impact | Adaptation | Recommendations | Local    | Gubbio, Italy          | Experiment/laboratory  | Extreme temperature | Outdoor/indoor thermal comfort  | 10.1016/j.scitotenv.2019.134448 |
| 508 | Ramachandran, R. M., Roy, P. S., Chakravarthi, V., Joshi, P. K., Sanjay, J.                               | 2020 | Land use and climate change impacts on distribution of plant species of conservation value in Eastern Ghats, India: a simulation study                                      | Adaptation | Recommendations | Local    | Ghats, India           | Scenarios/projections  | Socio-economic      | Plant species conservations     | 10.1007/s10661-019-8044-5       |
| 509 | Rodríguez, M. V., Cordero, A. S., Melgar, S. G., Andújar Márquez, J. M.                                   | 2020 | Impact of global warming in subtropical climate buildings: Future trends and mitigation strategies                                                                          | Mitigation | Recommendations | National | Spain                  | IPCC methodology       | Socio-economic      | Energy consumption of buildings | 10.3390/en13236188              |
| 510 | Rong, P., Zhang, Y., Qin, Y., Liu, G., Liu, R.                                                            | 2020 | Spatial differentiation of carbon emissions from residential energy consumption: A case study in Kaifeng, China                                                             | Mitigation | Recommendations | Local    | Kaifeng, China         | IPCC methodology       | Socio-economic      | Urban residential GHG emissions | 10.1016/j.jenvman.2020.110895   |
| 511 | Ruiz-Alvarez, O., Singh, V. P., Enciso-Medina, J., Ernesto Ontiveros-Capurata, R., Corrales-Suastegui, A. | 2020 | Spatio-Temporal Trends of Monthly and Annual Precipitation in Aguascalientes, Mexico                                                                                        | Adaptation | Recommendations | Local    | Aguascalientes, Mexico | Descriptive statistics | Socio-economic      | Agriculture                     | 10.3390/atmos11050437           |

|     |                                                                                                            |      |                                                                                                                                                                                       |            |                 |               |                                           |                        |                         |                 |                             |
|-----|------------------------------------------------------------------------------------------------------------|------|---------------------------------------------------------------------------------------------------------------------------------------------------------------------------------------|------------|-----------------|---------------|-------------------------------------------|------------------------|-------------------------|-----------------|-----------------------------|
| 513 | Sánchez-García, D.,<br>Bienvenido-Huertas, D., Pulido-Arcas, J. A., Rubio-Bellido, C.                      | 2020 | Analysis of energy consumption in different European cities: The adaptive comfort control implemented model (ACCIM) considering representative concentration pathways (RCP) scenarios | Adaptation | Recommendations | National      | Barcelona, Berlin, Bern, Rome, and Vienna | Scenarios/projections  | Extreme temperature     | Thermal comfort | 10.3390/app10041513         |
| 514 | Sapiains, R., Ugarte, A. M., Aldunce, P., Marchant, G., Romero, J. A., González, M. E., Inostroza-Lazo, V. | 2020 | Local perceptions of fires risk and policy implications in the hills of Valparaíso, Chile                                                                                             | Mitigation | Recommendations | Local         | Valparaíso, Chile                         | Descriptive statistics | Socio-economic          | Fire risk       | 10.3390/su12104298          |
| 519 | Setyono, P., Himawan, W., Sari, C. P., Gunawan, T., Murti, S. H.                                           | 2020 | Greenhouse gas pollution based on energy use and its mitigation potential in the city of Surakarta, Indonesia                                                                         | Mitigation | Recommendations | Local         | Surakarta, Indonesia                      | IPCC methodology       | Socio-economic          | Energy use      | 10.22146/ijg.48802          |
| 523 | Sol, E., Boyoung, H., Song, C., Eunbeen, P., Kim, J., Woo-Kyun, L.                                         | 2020 | Pilot Study and Development of Activity Data for Greenhouse Gas Inventory of Settlement Categories in Korea: A Case of Incheon Seo-gu                                                 | Mitigation | Recommendations | Without scale |                                           | *NR                    | Socio-economic          | GHG inventory   | *NR                         |
| 524 | Solyman, A., Abdel Monem, T.                                                                               | 2020 | Mapping Egypt Vulnerability to Sea Level Rise Scenarios                                                                                                                               | Adaptation | Recommendations | National      | Egypt                                     | Model                  | Sea level rise/flooding | Sea level rise  | 10.1007/978-3-030-41629-4_9 |
| 525 | Takane, Y., Ohashi, Y., Grimmond, C. S. B., Hara, M., Kikegawa, Y.                                         | 2020 | Asian megacity heat stress under future climate scenarios: Impact of air-conditioning feedback                                                                                        | Mitigation | Recommendations | Local         | Osaka, Japan                              | Model                  | Extreme temperature     | Heat stress     | 10.1088/2515-7620/ab6933    |

|     |                                                                                                                                       |      |                                                                                                                                     |                                |                 |               |                              |                             |                         |                                      |                                |
|-----|---------------------------------------------------------------------------------------------------------------------------------------|------|-------------------------------------------------------------------------------------------------------------------------------------|--------------------------------|-----------------|---------------|------------------------------|-----------------------------|-------------------------|--------------------------------------|--------------------------------|
| 526 | Tomatis, F.                                                                                                                           | 2020 | Análisis de posibles repercusiones del cambio climático sobre el Camino de Santiago Francés en su paso por Castilla y León (España) | Adaptation                     | Recommendations | Local         | Castilla y León, Spain       | Scenarios/projections       | Socio-economic          | Repercussions of climate change      | *NR                            |
| 527 | Villamor, E., Akizu-Gardoki, O., Azurza, O., Urkidi, L., Campos-Celador, A., Basurko, I., Hinojal, I. B.                              | 2020 | European cities in the energy transition: A preliminary analysis of 27 cities                                                       | Mitigation                     | Recommendations | International | 27 European cities           | Survey and participatory    | Socio-economic          | Energy transition                    | 10.3390/en13061315             |
| 528 | Wang, G., Liu, Y., Hu, Z., Lyu, Y., Zhang, G., Liu, J., Liu, Y., Gu, Y., Huang, X., Zheng, H., Zhang, Q., Tong, Z., Hong, C., Liu, L. | 2020 | Flood risk assessment based on fuzzy synthetic evaluation method in the beijing-tianjin-hebei metropolitan area, China              | Mitigation                     | Recommendations | National      | Beijing-Tianjin-Hebei, China | Machine learning/algorithms | Sea level rise/flooding | Flood risk                           | 10.3390/su12041451             |
| 533 | Zhang, L., Li, Z., Jia, X., Tan, R. R., Wang, F.                                                                                      | 2020 | Targeting carbon emissions mitigation in the transport sector – A case study in Urumqi, China                                       | Mitigation                     | Recommendations | Local         | Urumqi, China                | Model                       | Air quality             | Outdoor pollution-carbon emissions   | 10.1016/j.jclepro.2020.120811  |
| 535 | Zhang, P., Cai, W., Yao, M., Wang, Z., Yang, L., Wei, W.                                                                              | 2020 | Urban carbon emissions associated with electricity consumption in Beijing and the driving factors                                   | Mitigation                     | Recommendations | Local         | Beijing, China               | IPCC methodology            | Socio-economic          | Electricity-related carbon emissions | 10.1016/j.apenergy.2020.115425 |
| 536 | Zhao, C., Chen, J., Su, G., Yuan, H.                                                                                                  | 2020 | Assessment of the climate change adaptation capacity of urban agglomerations in China                                               | Both adaptation and mitigation | Recommendations | National      | Chinese cities               | Model                       | Socio-economic          | Adaptive capacity                    | 10.1007/s11027-019-09874-5     |

|     |                                                                                      |      |                                                                                                                                               |            |                                    |               |                                                    |                  |                      |                                         |                               |
|-----|--------------------------------------------------------------------------------------|------|-----------------------------------------------------------------------------------------------------------------------------------------------|------------|------------------------------------|---------------|----------------------------------------------------|------------------|----------------------|-----------------------------------------|-------------------------------|
| 540 | Bai, Y., Wang, W., Hu, Y., Wang, Z.                                                  | 2020 | County-level estimates of population and economic scenarios under the shared socioeconomic pathways: A case study in Inner Mongolia, China    | Mitigation | Recommendations                    | Local         | Inner Mongolia, China                              | Model            | Socio-economic       | Population and economic scenarios       | 10.1016/j.pce.2021.103017     |
| 541 | Bayomi, N., Elkholy, M., Rakha, T., Fernandez, J. E.                                 | 2020 | Passive survivability under extreme heat events: The case of AlDarb Al Ahmar, Cairo                                                           | Mitigation | Recommendations                    | Local         | Al Darb Al Ahmar, Cairo, Egypt                     | Model            | Extreme temperature  | Extreme heat event                      | 10.1080/23744731.2021.1953356 |
| 542 | Bozhko, L., Starodubets, N., Turgel, I., Naizabekov, A.                              | 2021 | GHG Emissions Assessment as Part of MSW Green Cluster Design: Case of Large Cities in Russia and Kazakhstan                                   | Mitigation | Specific evidence (green clusters) | International | Yekaterinburg (Russia) and Almaty (Kazakhstan)     | IPCC methodology | Air quality          | Pollution-CO2                           | 10.2478/rtuect-2021-0088      |
| 546 | Chauhan, D., Thiyaharajan, M., Pandey, A., Singh, N., Singh, V., Sen, S., Pandey, R. | 2021 | Climate change water vulnerability and adaptation mechanism in a Himalayan City, Nainital, India                                              | Adaptation | Recommendations                    | Local         | Nainital, India                                    | IPCC methodology | Water supply/drought | Water vulnerability                     | 10.1007/s11356-021-15713-5    |
| 547 | Chen, G., Xie, J., Li, W., Li, X., Hay Chung, L. C., Ren, C., Liu, X.                | 2021 | Future “local climate zone” spatial change simulation in Greater Bay Area under the shared socioeconomic pathways and ecological control line | Mitigation | Recommendations                    | National      | Guangdong-Hong Kong-Macao                          | IPCC methodology | Socio-economic       | Land use/land cover change              | 10.1016/j.builde.2021.108077  |
| 548 | Chen, L., Li, X., Yang, Y., Wang, M.                                                 | 2021 | Analyzing the features of energy consumption and carbon emissions in the Upper Yangtze River Economic Zone                                    | Mitigation | Recommendations                    | National      | Yunnan Guizhou Sichuan Chongqing (provinces in the | IPCC methodology | Socio-economic       | Energy consumption and carbon emissions | 10.1002/ghg.2067              |

|     |                                                                |      |                                                                                                                                                                    |                                |                 |               |                                          |                  |                         |                                                    |                                   |
|-----|----------------------------------------------------------------|------|--------------------------------------------------------------------------------------------------------------------------------------------------------------------|--------------------------------|-----------------|---------------|------------------------------------------|------------------|-------------------------|----------------------------------------------------|-----------------------------------|
|     |                                                                |      |                                                                                                                                                                    |                                |                 |               | Upper Yangtze River Economic Zone) China |                  |                         |                                                    |                                   |
| 549 | Chen, Q., Zha, D., Wang, L., Yang, G.                          | 2021 | The direct CO2 rebound effect in households: Evidence from China's provinces                                                                                       | Mitigation                     | Recommendations | National      | China                                    | IPCC methodology | Air quality             | Indoor pollution-CO2                               | 10.1016/j.rser.2021.111888        |
| 550 | Chen, T. L., Lin, Z. H.                                        | 2021 | Planning for climate change: evaluating the changing patterns of flood vulnerability in a case study in New Taipei City, Taiwan                                    | Mitigation                     | Recommendations | Local         | Taipei, Taiwan                           | Model            | Sea level rise/flooding | Flooding                                           | 10.1007/s00477-020-01890-1        |
| 551 | Cudjoe, D., Acquah, P. M.                                      | 2021 | Environmental impact analysis of municipal solid waste incineration in African countries                                                                           | Mitigation                     | Recommendations | International | 56 African countries                     | IPCC methodology | Socio-economic          | Solid waste incineration                           | 10.1016/j.chemosphere.2020.129186 |
| 552 | Gherri, B., Maiullari, D., Finizza, C., Maretto, M., Nabon, E. | 2021 | On Venetian Campi Resilience to Climate Change                                                                                                                     | Both adaptation and mitigation | Recommendations | Local         | Venice, Italy                            | IPCC methodology | Extreme temperature     | Thermal resilience-outdoor -indoor thermal comfort | 10.1088/1755-1315/863/1/012005    |
| 553 | Guan, Y., Shan, Y., Huang, Q., Chen, H., Wang, D., Hubacek, K. | 2021 | Assessment to China's Recent Emission Pattern Shifts                                                                                                               | Mitigation                     | Recommendations | National      | China                                    | IPCC methodology | Socio-economic          | Emission inventories                               | 10.1029/2021ef002241              |
| 555 | Jonghwa, P., Lee, S.                                           | 2021 | An Empirical Study on Inundation Vulnerability in Urban Declining Areas through Analysis of Sales Change in Living Businesses : Focused on Ulsan Metropolitan City | Mitigation                     | Recommendations | Local         | Ulsan, South Korea                       | Model            | Sea level rise/flooding | Inundation                                         | *NR                               |

|     |                                                                                   |      |                                                                                                                                    |                                |                 |               |                     |                          |                         |                                           |                                 |
|-----|-----------------------------------------------------------------------------------|------|------------------------------------------------------------------------------------------------------------------------------------|--------------------------------|-----------------|---------------|---------------------|--------------------------|-------------------------|-------------------------------------------|---------------------------------|
| 556 | Khan, N. A., Gao, Q., Abid, M., Shah, A. A.                                       | 2021 | Mapping farmers' vulnerability to climate change and its induced hazards: evidence from the rice-growing zones of Punjab, Pakistan | Adaptation                     | Recommendations | Local         | Punjab, Pakistan    | Survey and participatory | Socio-economic          | Farmers vulnerability                     | 10.1007/s11356-020-10758-4      |
| 558 | King, J.                                                                          | 2021 | The climate planner: Overcoming pushback against local mitigation and adaptation plans                                             | Both adaptation and mitigation | Recommendations | Without scale |                     | *NR                      | Socio-economic          | Climate planner                           | 10.4324/9781003181514           |
| 561 | Kotharkar, R., Ghosh, A., Kotharkar, V.                                           | 2021 | Estimating summertime heat stress in a tropical Indian city using Local Climate Zone (LCZ) framework                               | Mitigation                     | Recommendations | Local         | Nagpur, India       | Model                    | Extreme temperature     | Heat stress                               | 10.1016/j.uclm.2021.100784      |
| 562 | Ku, H., Kim, T., Song, Y. I.                                                      | 2021 | Coastal vulnerability assessment of sea-level rise associated with typhoon-induced surges in South Korea                           | Adaptation                     | Recommendations | National      | South Korea         | IPCC methodology         | Sea level rise/flooding | Sea level rise and typhoon-induced surges | 10.1016/j.ocecoaman.2021.105884 |
| 563 | Lando, A. T., Rahim, I. R., Sari, K., Djamaluddin, I., Arifin, A. N., Sari, A. M. | 2021 | Estimation of methane emissions from municipal solid waste landfill in Makassar city based on ipcc waste model                     | Both adaptation and mitigation | Recommendations | Local         | Makassar, Indonesia | IPCC methodology         | Air quality             | Outdoor pollution-CH4                     | 10.1088/1755-1315/841/1/012002  |
| 564 | Lauzet, N., Colinart, T., Musy, M., Lapray, K.                                    | 2021 | Selecting extreme weather file to assess overheating in residential building                                                       | Adaptation                     | Recommendations | Local         | Lyon, , France      | Scenarios/projections    | Extreme temperature     | Thermal comfort-overheating               | 10.1088/1742-6596/2069/1/012231 |
| 566 | Liu, Y., Chen, S., Chen, A. Y., Lou, Z.                                           | 2021 | Variations of GHG emission patterns from waste disposal processes in megacity Shanghai from 2005 to 2015                           | Mitigation                     | Recommendations | Local         | Shangha, China      | IPCC methodology         | Air quality             | Outdoor pollution- CO2, CH4, N2O          | 10.1016/j.jclepro.2021.126338   |



|     |                                                                                       |      |                                                                                                                                                      |            |                 |               |                                                             |                          |                         |                                                                              |                              |
|-----|---------------------------------------------------------------------------------------|------|------------------------------------------------------------------------------------------------------------------------------------------------------|------------|-----------------|---------------|-------------------------------------------------------------|--------------------------|-------------------------|------------------------------------------------------------------------------|------------------------------|
| 567 | Lo, W., Huang, C. T., Wu, M. H., Doong, D. J., Tseng, L. H., Chen, C. H., Chen, Y. J. | 2021 | Evaluation of flood mitigation effectiveness of nature-based solutions potential cases with an assessment model for flood mitigation                 | Mitigation | Recommendations | Local         | Nangang, Taiwan                                             | Model                    | Socio-economic          | Nature Base Solutions                                                        | 10.3390/w13233451            |
| 570 | Maués, L. M., Beltrão, N., Silva, I.                                                  | 2021 | Ghg emissions assessment of civil construction waste disposal and transportation process in the eastern amazon                                       | Mitigation | Recommendations | Local         | Brazilian Amazon                                            | Descriptive statistics   | Socio-economic          | Urban construction waste                                                     | 10.3390/su13105666           |
| 572 | Moore, L., Steynor, A., Waagsaether, K. L., Spires, M., Marie, A.                     | 2021 | Exploring the opportunities and constraints to the development of locally applicable water management technology in three sub-Saharan African cities | Adaptation | Recommendations | International | Blantyre, Harare, and Gaborone (Malawi, Zimbabwe, Botswana) | Survey and participatory | Water supply/drought    | Water management                                                             | 10.1016/j.envsci.2021.02.010 |
| 573 | Mycoo, M., Robinson, S. A., Nguyen, C., Nisbet, C., Tonkel, R. III                    | 2021 | Human Adaptation to Coastal Hazards in Greater Bridgetown, Barbados                                                                                  | Adaptation | Recommendations | Local         | Bridgetown, Barbados                                        | Content analysis         | Sea level rise/flooding | vulnerability to coastal hazards (sea-level rise, storm surges and flooding) | 10.3389/fenvs.2021.647788    |
| 575 | Papagiannakis, A., Ntafos, K.                                                         | 2021 | Impact Assessment of Climate Change on Coastal Transport Systems in the Greater Thessaloniki Area                                                    | Adaptation | Recommendations | Local         | Thessaloniki, Greece                                        | Scenarios/projections    | Sea level rise/flooding | Sea level rise                                                               | 10.1007/978-3-030-61075-3_73 |
| 576 | Rahman, M. M., Rahman, S. M., Rahman, M. S., Hasan, M. A.,                            | 2021 | Greenhouse gas emissions from solid waste management in Saudi Arabia—analysis                                                                        | Mitigation | Recommendations | National      | Saudi Arabia                                                | IPCC methodology         | Socio-economic          | Solid waste management                                                       | 10.3390/app1041737           |

|     |                                                                                                                         |      |                                                                                                                                            |            |                                                                                                               |          |                       |                           |                    |                                                                                                     |                                            |
|-----|-------------------------------------------------------------------------------------------------------------------------|------|--------------------------------------------------------------------------------------------------------------------------------------------|------------|---------------------------------------------------------------------------------------------------------------|----------|-----------------------|---------------------------|--------------------|-----------------------------------------------------------------------------------------------------|--------------------------------------------|
|     | Shoaib, S. A.,<br>Rushd, S.                                                                                             |      | of growth dynamics and<br>mitigation opportunities                                                                                         |            |                                                                                                               |          |                       |                           |                    |                                                                                                     |                                            |
| 577 | Robertson, J. C.,<br>Randrup, K. V.,<br>Howe, E. R., Case,<br>M. J., Levin, P. S.                                       | 2021 | Leveraging the potential<br>of nature to meet net zero<br>greenhouse gas<br>emissions in Washington<br>State                               | Mitigation | Recomm<br>endation<br>s                                                                                       | Local    | Washingto<br>n, U.S.A | Scenarios/pr<br>ojections | Socio-<br>economic | Net zero<br>greenhouse gas<br>emission                                                              | 10.7717/peerj<br>.11802                    |
| 579 | Sam A. G., Abidoye,<br>B. O., Mashaba, S.                                                                               | 2021 | Climate change and<br>household welfare in<br>sub-Saharan Africa:<br>empirical evidence from<br>Swaziland                                  | Adaptation | Recomm<br>endation<br>s                                                                                       | National | Swaziland             | Model                     | Socio-<br>economic | Household<br>welfare and food<br>insecurity                                                         | 10.1007/s125<br>71-020-<br>01113-z         |
| 581 | Suryati, I., Herlina,<br>N., Hasibuan, N. H.,<br>Siregar, R. L.,<br>Husna, A., Silalahi,<br>A., Audina, M.,<br>Sari, S. | 2021 | The mitigation strategy<br>for reducing greenhouse<br>gas emissions from<br>household activities in<br>Medan city                          | Mitigation | Recomm<br>endation<br>s                                                                                       | Local    | Medan,<br>Indonesia   | IPCC<br>methodolog<br>y   | Air quality        | Indoor pollution-<br>GHG emissions<br>(CO <sub>2</sub> , CH <sub>4</sub> , and<br>N <sub>2</sub> O) | 10.1088/1755<br>-<br>1315/802/1/0<br>12034 |
| 582 | Suryati, I., Hijriani,<br>A., Indrawan, I.                                                                              | 2021 | Estimation of greenhouse<br>gas emission from<br>household activities<br>during the COVID-19<br>pandemic in Binjai City,<br>North Sumatera | Mitigation | Recomm<br>endation<br>s                                                                                       | Local    | Binjai,<br>Indonesia  | IPCC<br>methodolog<br>y   | Air quality        | Indoor pollution-<br>GHG emissions<br>(CO <sub>2</sub> , CH <sub>4</sub> )                          | 10.1088/1755<br>-<br>1315/896/1/0<br>12054 |
| 587 | Xu, L., Geng, Y.,<br>Wu, D., Zhang, C.,<br>Xiao, S.                                                                     | 2021 | Carbon Footprint of<br>Residents' Housing<br>Consumption and Its<br>Driving Forces in China                                                | Mitigation | Specific<br>evidence<br>(Controlli<br>ng<br>populatio<br>n growth<br>and<br>promotin<br>g<br>urbanizat<br>ion | National | China                 | IPCC<br>methodolog<br>y   | Socio-<br>economic | Housing carbon<br>footprints                                                                        | 10.3390/en14<br>133890                     |

|     |                                        |      |                                                                                                                                                                      |            |                                                                                                                                                   |          |                       |                       |                      |                       |                             |
|-----|----------------------------------------|------|----------------------------------------------------------------------------------------------------------------------------------------------------------------------|------------|---------------------------------------------------------------------------------------------------------------------------------------------------|----------|-----------------------|-----------------------|----------------------|-----------------------|-----------------------------|
|     |                                        |      |                                                                                                                                                                      |            | benefits; encouraging green consumption; optimizing household energy consumption structure, and enhancing residential building energy management) |          |                       |                       |                      |                       |                             |
| 588 | Yang, X., Shang, G., Deng, X.          | 2021 | Estimation, decomposition and reduction potential calculation of carbon emissions from urban construction land: evidence from 30 provinces in China during 2000–2018 | Mitigation | Recommendations                                                                                                                                   | National | China                 | IPCC methodology      | Air quality          | Outdoor pollution-CO2 | 10.1007/s10668-021-01769-3  |
| 589 | Alkhawaga, A., Zeidan, B., Elshemy, M. | 2021 | Climate change impacts on water security elements of Kafr El-Sheikh governorate, Egypt                                                                               | Adaptation | Recommendations                                                                                                                                   | Local    | Kafr El Sheikh, Egypt | Scenarios/projections | Water supply/drought | Water security        | 10.1016/j.agwat.2021.107217 |
